# Supplementary material for: Metabolomics and Communication Skills Development in Children; Evidence from the Ages and Stages Questionnaire
Source: MDPI journal article supplement (doi:10.3390/metabo9030042), 2019-03-05
Supplement: s1 [file s1]

Supplementary Figures

Supplementary Figure S1: Trajectory of Communication Score Category at ages 1, 2 and 3 in 403 Children with plasma metabolomics profiling

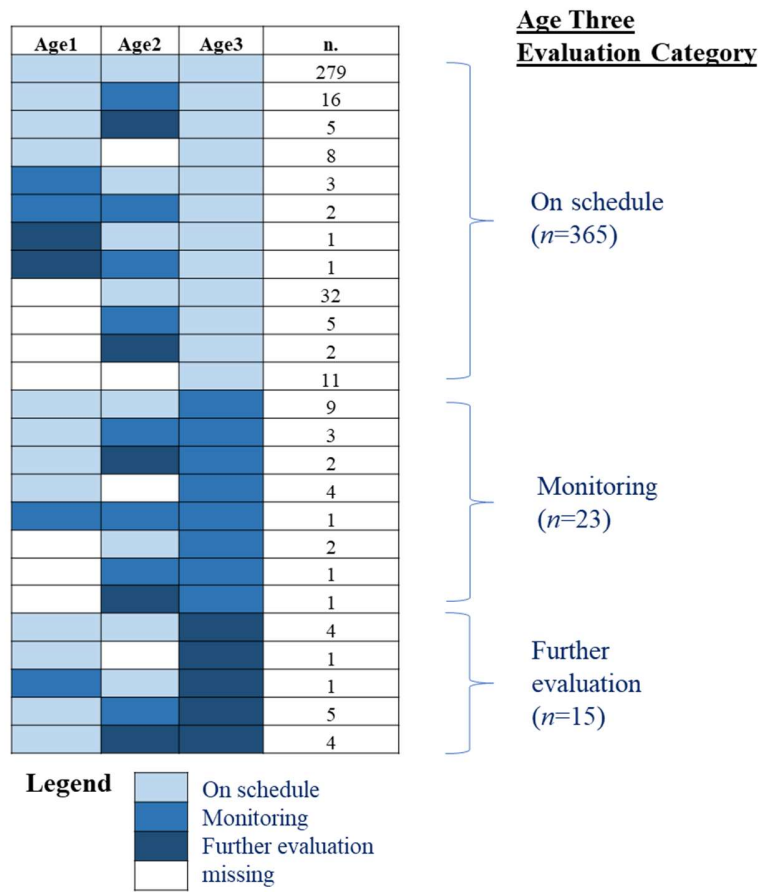

**Supplementary Figure S2: (A) Scores plot for the PLS-DA Model Based on all 481 Plasma Metabolites Comparing Children with ASQ Assessed Communication Skills on Schedule for Developing Normally (n=365) versus those Requiring Further Monitoring/Follow up (n=38);  $R^2=0.13$ ;  $Q^2=-0.21$ ; permutation p-value = 0.994; (B) Plasma Metabolites with a VIP score >2, Indicating the Greatest Ability to Discriminate Between the Two Groups**

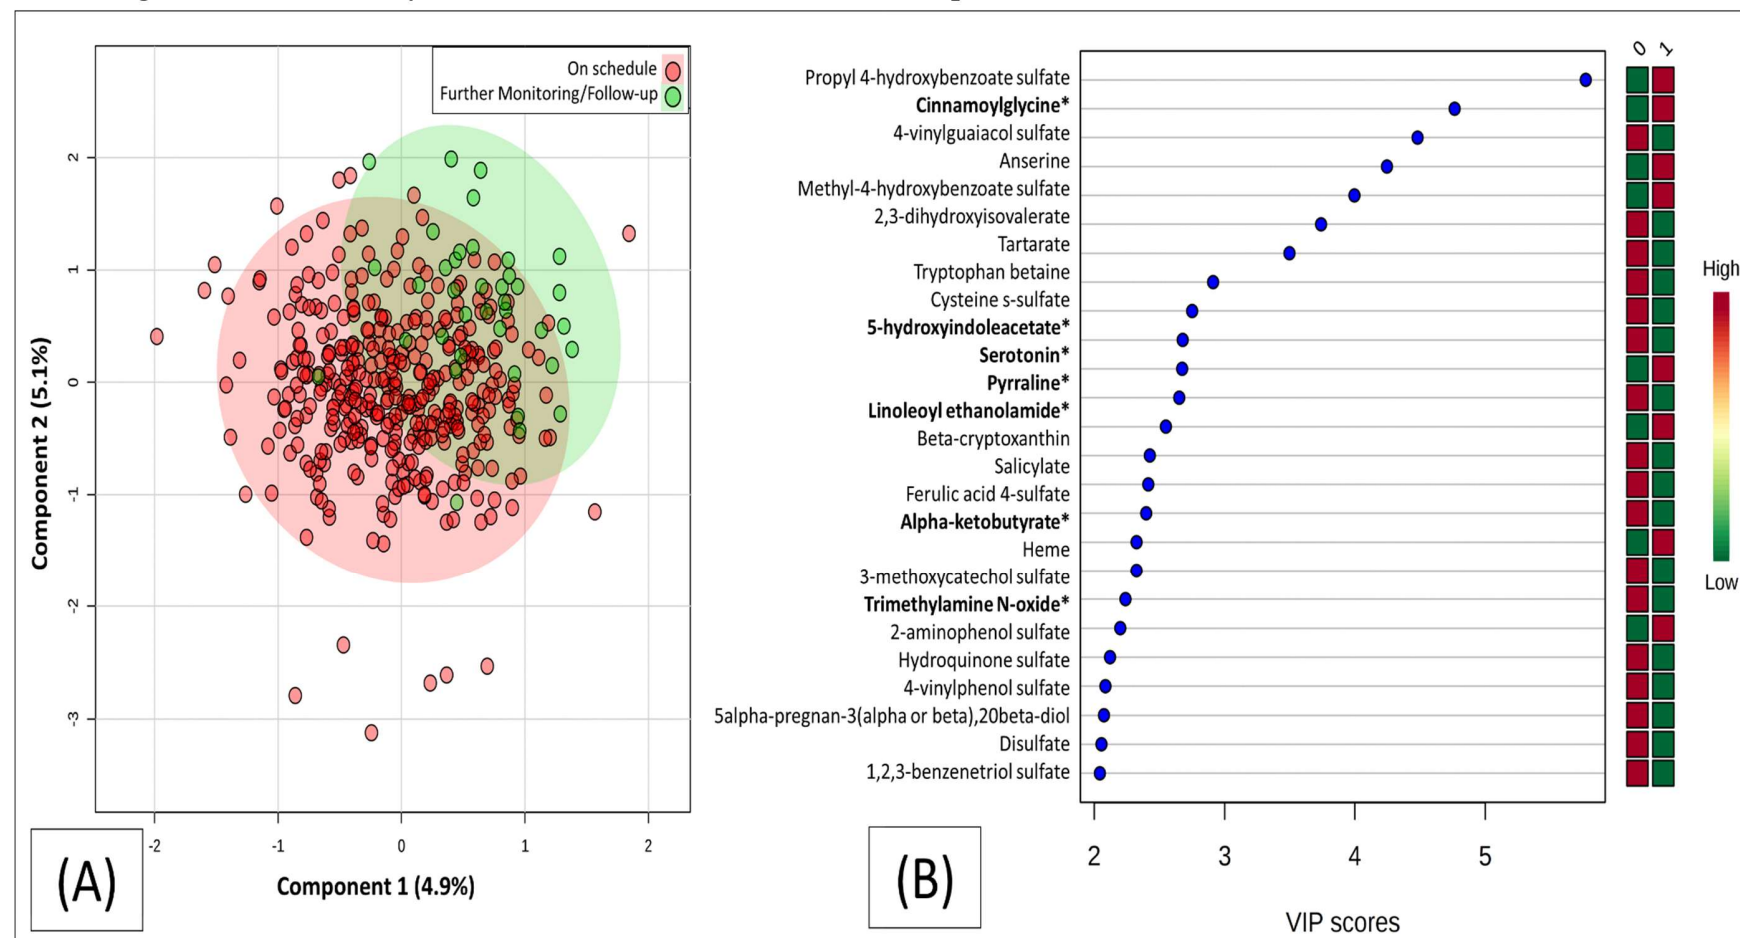

\*Metabolites that were significantly associated with binary communication score ( $p < 0.05$ ) in the logistic regression models

**Supplementary Figure S3: (A) Scores plot for the PLS-DA Model Based on all 737 Stool Metabolites Comparing Children with ASQ Assessed Communication Skills on Schedule for Developing Normally (n=204) versus those Requiring Further Monitoring/Follow up (n=24);  $R^2=0.10$ ;  $Q^2=-1.13$ ; permutation p-value = 0.985; (B) Plasma Metabolites with a VIP score >2, Indicating the Greatest Ability to Discriminate Between the Two Groups**

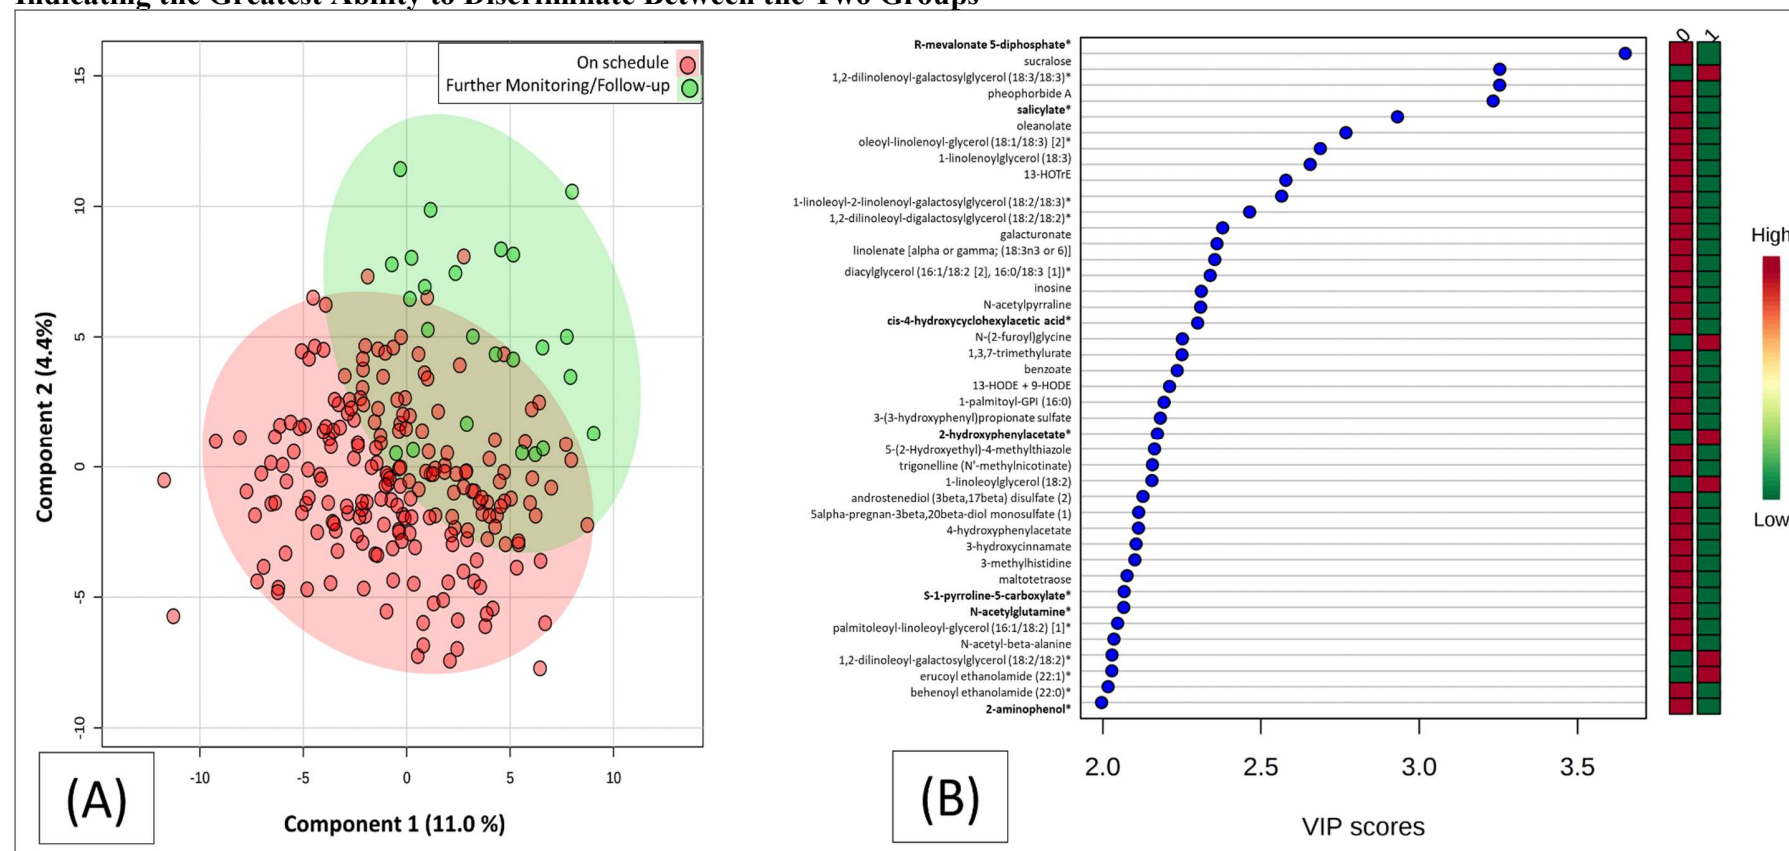

\*Metabolites that were significantly associated with binary communication score ( $p < 0.05$ ) in the logistic regression model

**Supplementary Figure S4: Receiver Operator Characteristic Curves and Corresponding AUCS for the prediction of autism by age 8 according to three models**

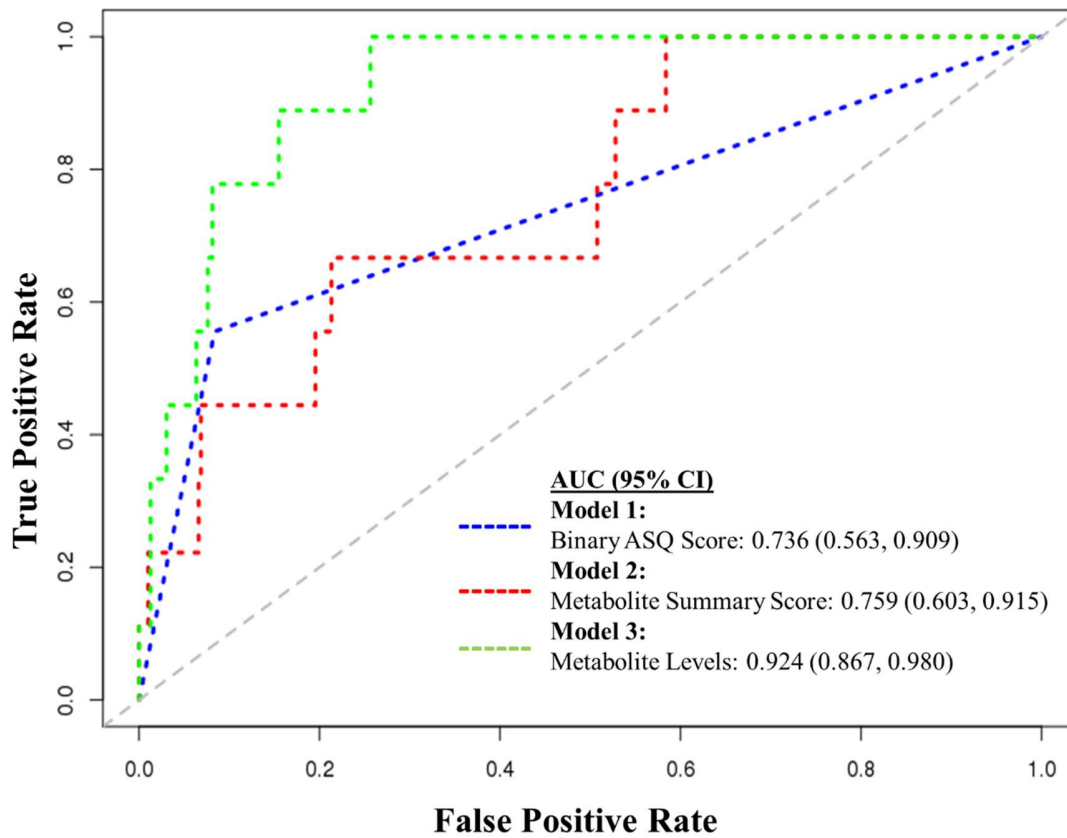

*AUC- Area under the curve*

## Supplementary Tables

**Table S1: Baseline characteristics of 228 children from VDAART with plasma and stool metabolomic profiling and an ASQ score at age 3**

|                            |                                  | On Schedule<br>(n=204) |       | Needs<br>monitoring<br>(n=14) |       | Requires<br>further<br>evaluation<br>(n=10) |       | p-value              |
|----------------------------|----------------------------------|------------------------|-------|-------------------------------|-------|---------------------------------------------|-------|----------------------|
|                            |                                  | n                      | %     | n                             | %     | n                                           | %     |                      |
| Sex                        | Female                           | 99                     | 48.5% | 5                             | 35.7% | 3                                           | 30.0% | 0.356                |
|                            | Males                            | 105                    | 51.5% | 9                             | 64.3% | 7                                           | 70.0% |                      |
| Site                       | San Diego                        | 64                     | 31.4% | 4                             | 28.6% | 0                                           | 0.0%  | 0.108                |
|                            | Boston                           | 31                     | 15.2% | 2                             | 14.3% | 4                                           | 40.0% |                      |
|                            | St Louis                         | 109                    | 53.4% | 8                             | 57.1% | 6                                           | 60.0% |                      |
| Race                       | Black                            | 89                     | 43.6% | 8                             | 57.1% | 7                                           | 70.0% | 0.467                |
|                            | White                            | 42                     | 20.6% | 1                             | 7.1%  | 1                                           | 10.0% |                      |
|                            | Other                            | 73                     | 35.8% | 5                             | 35.7% | 2                                           | 20.0% |                      |
| Treatment                  | Vitamin D                        | 102                    | 50.0% | 7                             | 50.0% | 5                                           | 50.0% | 1.00                 |
|                            | Placebo                          | 102                    | 50.0% | 7                             | 50.0% | 5                                           | 50.0% |                      |
| Asthma/Wheeze              | Yes                              | 80                     | 39.2% | 5                             | 35.7% | 6                                           | 60.0% | 0.447                |
|                            | No                               | 124                    | 60.8% | 9                             | 64.3% | 4                                           | 40.0% |                      |
| Maternal Marital Status    | Married                          | 99                     | 48.5% | 6                             | 42.9% | 2                                           | 20.0% | 0.530                |
|                            | Not married/not living together  | 54                     | 26.5% | 5                             | 35.7% | 5                                           | 50.0% |                      |
|                            | Not married - living together    | 45                     | 22.1% | 3                             | 21.4% | 3                                           | 30.0% |                      |
|                            | Separated/Divorced               | 6                      | 2.9%  | 0                             | 0.0%  | 0                                           | 0.0%  |                      |
| Maternal Educational Level | Less than high school            | 28                     | 13.7% | 2                             | 14.3% | 2                                           | 20.0% | 0.119                |
|                            | High school, Technical school    | 60                     | 29.4% | 5                             | 35.7% | 4                                           | 40.0% |                      |
|                            | Some college                     | 40                     | 19.6% | 4                             | 28.6% | 4                                           | 40.0% |                      |
|                            | College graduate/Graduate school | 76                     | 37.3% | 3                             | 21.4% | 0                                           | 0.0%  |                      |
| BMI                        | mean (SD)                        | 17.5 (2.3)             |       | 16.4 (1.1)                    |       | 16.8 (2.0)                                  |       | 0.557                |
| Age 1 Communication Score  | On Schedule                      | 173                    | 84.8% | 13                            | 92.9% | 9                                           | 90.0% | 0.431                |
|                            | Needs monitoring                 | 3                      | 1.5%  | 0                             | 0.0%  | 1                                           | 10.0% |                      |
|                            | Requires further evaluation      | 1                      | 0.5%  | 0                             | 0.0%  | 0                                           | 0.0%  |                      |
|                            | Missing                          | 22                     | 10.8% | 1                             | 7.1%  | 0                                           | 0.0%  |                      |
| Age 2 Communication Score  | On Schedule                      | 181                    | 88.7% | 8                             | 57.1% | 5                                           | 50.0% | 2.3x10 <sup>-4</sup> |
|                            | Needs monitoring                 | 13                     | 6.4%  | 2                             | 14.3% | 2                                           | 20.0% |                      |
|                            | Requires further evaluation      | 3                      | 1.5%  | 1                             | 7.1%  | 2                                           | 20.0% |                      |
|                            | Missing                          | 7                      | 3.4%  | 3                             | 21.4% | 1                                           | 10.0% |                      |

**Table S2: Correlation between Communication Score and Scores in the three other ASQ domains**

|                                | <b>Spearman <math>r</math> (p-value)</b> |
|--------------------------------|------------------------------------------|
| <b>Fine Motor Skills Score</b> | 0.40 ( $<2.2 \times 10^{-16}$ )          |
| <b>Gross Motor Skills</b>      | 0.30 ( $6.8 \times 10^{-10}$ )           |
| <b>Personal Social Skills</b>  | 0.45 ( $<2.2 \times 10^{-16}$ )          |
| <b>Problem Solving Skills</b>  | 0.46 ( $<2.2 \times 10^{-16}$ )          |

**Table S3: 481 Plasma Metabolites that Passed QC with information on Profiling Platform, Superpathway, Subpathway and HMDB ID**

*See excel file\*

**Table S4: Association Between 15 Significant Plasma Metabolites and Binary ASQ score, Stratified by Study Site**

| Metabolite                                                             | San Diego                          |         | Boston                                          |         | St Louis                          |         |
|------------------------------------------------------------------------|------------------------------------|---------|-------------------------------------------------|---------|-----------------------------------|---------|
|                                                                        | OR (95% CI)                        | p-value | OR (95% CI)                                     | p-value | OR (95% CI)                       | p-value |
| <b>N-formylphenylalanine</b>                                           | 0.02(6.4x10 <sup>-6</sup> ,40.67)  | 0.309   | 3x10 <sup>-4</sup> (6.8x10 <sup>-7</sup> ,0.07) | 0.005*  | 0.01(9.9x10 <sup>-5</sup> ,1.02)  | 0.06    |
| <b>Trimethylamine N-oxide</b>                                          | 15.2(0.07,2031.3)                  | 0.288   | 247.4(4.44,27655.2)                             | 0.011*  | 7.39(0.2,226.6)                   | 0.258   |
| <b>Cinnamoylglycine</b>                                                | 0.4(0.01,6.75)                     | 0.58    | 4.35(0.9,21.71)                                 | 0.066   | 4.63(1.08,19.89)                  | 0.037*  |
| <b>Linoleoyl ethanolamide</b>                                          | 43.7(0.23,5154.9)                  | 0.123   | 10.57(0.34,359.5)                               | 0.178   | 7.29(0.56,84.4)                   | 0.111   |
| <b>Palmitoyl ethanolamide</b>                                          | 13082.1(0.25,6.4x10 <sup>8</sup> ) | 0.078   | 19.6(0.01,36700.5)                              | 0.441   | 65.2(0.46,7726.9)                 | 0.085   |
| <b>5-hydroxyindoleacetate</b>                                          | 0.04(3.5x10 <sup>-4</sup> ,1.95)   | 0.144   | 0.09(3.9x10 <sup>-3</sup> ,1.29)                | 0.098   | 0.31(4.0x10 <sup>-3</sup> ,11.47) | 0.562   |
| <b>Erythritol</b>                                                      | 1261.4(1.73,1.9x10 <sup>6</sup> )  | 0.036*  | 2.12(0.01,351.7)                                | 0.776   | 9.81(0.26,297.9)                  | 0.171   |
| <b>Pyrraline</b>                                                       | 0.05(3.7x10 <sup>-4</sup> ,2.4)    | 0.183   | 0.29(0.02,3.53)                                 | 0.367   | 0.07(2.6x10 <sup>-3</sup> ,1.31)  | 0.097   |
| <b>Sphingomyelin (d18:1/25:0, d19:0/24:1, d20:1/23:0, d19:1/24:0)*</b> | 1.7x10 <sup>-3</sup> (0.02,3.39)   | 0.142   | 0.01(9.2x10 <sup>-6</sup> ,3.36)                | 0.142   | 0.08(5.0x10 <sup>-4</sup> ,7.45)  | 0.305   |
| <b>Docosahexaenoylcarnitine (C22:6)*</b>                               | 43.35(1.2,1655.5)                  | 0.034*  | 5.81(0.18,156.0)                                | 0.297   | 3.45(0.25,34.49)                  | 0.315   |
| <b>Prolylhydroxyproline</b>                                            | 385.68(0.03,1.9x10 <sup>6</sup> )  | 0.159   | 0.07(1.8x10 <sup>-5</sup> ,282.6)               | 0.529   | 751(3.14,2.3x10 <sup>5</sup> )    | 0.019*  |
| <b>Alpha-ketobutyrate</b>                                              | 3.53(0.16,49.44)                   | 0.372   | 2.95(0.3,24.98)                                 | 0.324   | 4.12(0.63,23.48)                  | 0.118   |
| <b>N-formylanthranilic acid</b>                                        | 5.82(0.01,1771.8)                  | 0.575   | 0.05(3.5x10 <sup>-4</sup> ,2.08)                | 0.202   | 0.03(3.0x10 <sup>-4</sup> ,1.25)  | 0.083   |
| <b>Serotonin</b>                                                       | 24.5(0.23,2320.6)                  | 0.162   | 1.14(0.05,18.44)                                | 0.928   | 15.49(1.5,178.4)                  | 0.023*  |
| <b>Oleoyl ethanolamide</b>                                             | 91.56(0.11,44714)                  | 0.157   | 4.43(0.06,250.9)                                | 0.478   | 12.74(0.44,334.5)                 | 0.122   |

*Logistic regression models were unadjusted due to convergence issues with small numbers*

*\*Significant at the 95% confidence interval*

**Table S5: 737 Stool Metabolites that Passed QC with information on Profiling Platform, Superpathway, Subpathway and HMDB ID**

*See excel file*



**Table S6: Metabolites Associated with Binary ASQ Communication Score at age three in blood plasma samples from ages 1 and 3**

| Metabolite                                                     | Super Pathway | Sub Pathway                            | HMDB ID   | Age 1 Blood samples                 |         | Age 3 Blood samples               |         | Correlation between Age 1 and Age 3 Levels* |
|----------------------------------------------------------------|---------------|----------------------------------------|-----------|-------------------------------------|---------|-----------------------------------|---------|---------------------------------------------|
|                                                                |               |                                        |           | OR (95% CI)                         | p-value | OR (95% CI)                       | p-value | r (p-value)                                 |
| linoleoyl ethanolamide                                         | Lipid         | Endocannabinoid                        | HMDB12252 | 673.0 (13.3,4.8x10 <sup>4</sup> )   | 0.002   | 12.4 (1.7,92.7)                   | 0.013   | 0.18 (0.007)                                |
| oleoyl ethanolamide                                            | Lipid         | Endocannabinoid                        | HMDB02088 | 1320.1 (11.2.3x10 <sup>5</sup> )    | 0.004   | 12.7 (1,161.4)                    | 0.048   | 0.23 (0.001)                                |
| palmitoyl ethanolamide                                         | Lipid         | Endocannabinoid                        | HMDB02100 | 17911.5 (24.7,2.8x10 <sup>7</sup> ) | 0.007   | 141.7 (2.3,9324.3)                | 0.019   | 0.26 (1.2x10 <sup>-4</sup> )                |
| docosahexaenoylcarnitine (C22:6)                               | Lipid         | Fatty Acid Metabolism (Acyl Carnitine) | -         | 6.6 (1.1,40.6)                      | 0.036   | 6.3 (1.1,34.8)                    | 0.037   | 0.13 (0.064)                                |
| sphingomyelin (d18:1/25:0, d19:0/24:1, d20:1/23:0, d19:1/24:0) | Lipid         | Sphingolipid Metabolism                | -         | 0.02 (3.3x10 <sup>-8</sup> ,0.4)    | 0.043   | 0.02 (5.7x10 <sup>-4</sup> ,0.62) | 0.034   | 0.37(2.4x10 <sup>-8</sup> )                 |

\*Spearman's correlation coefficient among 215 children with plasma metabolomics profiling at age 1 and age 3

**Table S7: Subsequent Diagnoses of Autism by age eight stratified by ASQ communication score category at age 2 and at age 3 among 403 children with ASQ communication score and metabolomics profiling**

|                                  |                                                                            | Diagnosis of Autism by Age 8 |             |                            |                                              |
|----------------------------------|----------------------------------------------------------------------------|------------------------------|-------------|----------------------------|----------------------------------------------|
|                                  |                                                                            | Yes                          | No          | <i>fishers p-value</i>     | OR (95% CI), <i>p-value</i>                  |
| <b>Age 2 Communication Score</b> | <b>On Schedule (n=331)<br/>Needs monitoring/ Further Evaluation (n=48)</b> | 3 (0.9%)                     | 328 (99.1%) | <i>0.001</i>               | 12.7 (3.0, 63.8); <i>6.8x10<sup>-4</sup></i> |
|                                  |                                                                            | 5 (10.4%)                    | 43 (89.6%)  |                            |                                              |
| <b>Age 3 Communication Score</b> | <b>On Schedule (n=365)<br/>Needs monitoring/ Further Evaluation (n=38)</b> | 4 (1.1%)                     | 361 (98.9%) | <i>5.5x10<sup>-4</sup></i> | 13.7 (3.4, 57.6); <i>1.7x10<sup>-4</sup></i> |
|                                  |                                                                            | 5 (13.2%)                    | 33 (86.8%)  |                            |                                              |

*Odds ratios are unadjusted due to small cell counts*

**Table S8: Power Analysis for the Plasma and Stool Logistic Regression Models; assuming an alpha of 0.05 and an event rate of 0.09 and a sample size of 403 for plasma and an event rate of 0.11 and a sample size of 228 for stool**

| Odds Ratio | Power  |        |
|------------|--------|--------|
|            | Plasma | Stool  |
| 0.2        | 100.0% | 100.0% |
| 0.4        | 100.0% | 98.9%  |
| 0.6        | 84.9%  | 65.7%  |
| 0.8        | 25.7%  | 17.7%  |
| 1.0        |        |        |
| 1.2        | 18.6%  | 13.2%  |
| 1.4        | 50.4%  | 34.4%  |
| 1.6        | 78.6%  | 58.5%  |
| 1.8        | 93.1%  | 77.7%  |
| 2.0        | 98.2%  | 89.4%  |
| 2.2        | 99.6%  | 95.4%  |
| 2.4        | 99.9%  | 98.2%  |
| 2.6        | 100.0% | 99.3%  |
| 2.8        | 100.0% | 99.7%  |
| 3.0        | 100.0% | 99.9%  |
| 3.2        | 100.0% | 100.0% |
| 3.4        | 100.0% | 100.0% |
| 3.6        | 100.0% | 100.0% |
| 3.8        | 100.0% | 100.0% |
| 4.0        | 100.0% | 100.0% |
