# Supplementary material for: Metabolomics and Communication Skills Development in Children; Evidence from the Ages and Stages Questionnaire
Source: Metabolites. 2019 Mar 5;9(3):42. doi: 10.3390/metabo9030042 (PMC6468693; doi:10.3390/metabo9030042)
Supplement: Supplementary file 1 [file metabolites-09-00042-s001.zip › Supplementary Table S3.csv]

PLATFORM	SUPER.PATHWAY	SUB.PATHWAY	BIOCHEMICAL	HMDB ID
LC/MS Neg	Amino Acid	Glutamate Metabolism	beta-citrylglutamate
LC/MS Neg	Amino Acid	Glutathione Metabolism	5-oxoproline	HMDB00267
LC/MS Neg	Amino Acid	Glutathione Metabolism	cys-gly, oxidized
LC/MS Neg	Amino Acid	Glycine, Serine and Threonine Metabolism	N-acetylthreonine
LC/MS Neg	Amino Acid	Histidine Metabolism	3-methylhistidine	HMDB00479
LC/MS Neg	Amino Acid	Histidine Metabolism	histidine	HMDB00177
LC/MS Neg	Amino Acid	Leucine, Isoleucine and Valine Metabolism	2,3-dihydroxy-2-methylbutyrate	HMDB29576
LC/MS Neg	Amino Acid	Leucine, Isoleucine and Valine Metabolism	2-hydroxy-3-methylvalerate	HMDB00317
LC/MS Neg	Amino Acid	Leucine, Isoleucine and Valine Metabolism	3-hydroxy-2-ethylpropionate	HMDB00396
LC/MS Neg	Amino Acid	Leucine, Isoleucine and Valine Metabolism	3-methyl-2-oxobutyrate	HMDB00019
LC/MS Neg	Amino Acid	Leucine, Isoleucine and Valine Metabolism	3-methyl-2-oxovalerate	HMDB03736
LC/MS Neg	Amino Acid	Leucine, Isoleucine and Valine Metabolism	4-methyl-2-oxopentanoate	HMDB00695
LC/MS Neg	Amino Acid	Leucine, Isoleucine and Valine Metabolism	alpha-hydroxyisocaproate	HMDB00746
LC/MS Neg	Amino Acid	Leucine, Isoleucine and Valine Metabolism	beta-hydroxyisovalerate	HMDB00754
LC/MS Neg	Amino Acid	Leucine, Isoleucine and Valine Metabolism	isobutyrylglycine (C4)	HMDB00730
LC/MS Neg	Amino Acid	Leucine, Isoleucine and Valine Metabolism	isovalerate (C5)	HMDB00718
LC/MS Neg	Amino Acid	Leucine, Isoleucine and Valine Metabolism	isovalerylglycine	HMDB00678
LC/MS Neg	Amino Acid	Leucine, Isoleucine and Valine Metabolism	N-acetylleucine	HMDB11756
LC/MS Neg	Amino Acid	Leucine, Isoleucine and Valine Metabolism	N-acetylvaline	HMDB11757
LC/MS Neg	Amino Acid	Leucine, Isoleucine and Valine Metabolism	valine	HMDB00883
LC/MS Neg	Amino Acid	Lysine Metabolism	6-oxopiperidine-2-carboxylate	HMDB61705
LC/MS Neg	Amino Acid	Lysine Metabolism	N6-acetyllysine	HMDB00206
LC/MS Neg	Amino Acid	Methionine, Cysteine, SAM and Taurine Metabolism	N-acetylmethionine	HMDB11745
LC/MS Neg	Amino Acid	Methionine, Cysteine, SAM and Taurine Metabolism	N-acetyltaurine
LC/MS Neg	Amino Acid	Methionine, Cysteine, SAM and Taurine Metabolism	N-formylmethionine	HMDB01015
LC/MS Neg	Amino Acid	Methionine, Cysteine, SAM and Taurine Metabolism	S-methylcysteine	HMDB02108
LC/MS Neg	Amino Acid	Phenylalanine Metabolism	N-acetylphenylalanine	HMDB00512
LC/MS Neg	Amino Acid	Phenylalanine Metabolism	phenyllactate (PLA)	HMDB00779
LC/MS Neg	Amino Acid	Polyamine Metabolism	acisoga
LC/MS Neg	Amino Acid	Tryptophan Metabolism	3-indoxyl sulfate	HMDB00682
LC/MS Neg	Amino Acid	Tryptophan Metabolism	5-bromotryptophan
LC/MS Neg	Amino Acid	Tryptophan Metabolism	5-hydroxyindoleacetate	HMDB00763
LC/MS Neg	Amino Acid	Tryptophan Metabolism	indoleacetate	HMDB00197
LC/MS Neg	Amino Acid	Tryptophan Metabolism	indolelactate	HMDB00671
LC/MS Neg	Amino Acid	Tryptophan Metabolism	indolepropionate	HMDB02302
LC/MS Neg	Amino Acid	Tryptophan Metabolism	kynurenate	HMDB00715
LC/MS Neg	Amino Acid	Tryptophan Metabolism	N-acetyltryptophan	HMDB13713
LC/MS Neg	Amino Acid	Tyrosine Metabolism	3-(4-hydroxyphenyl)lactate (HPLA)	HMDB00755
LC/MS Neg	Amino Acid	Tyrosine Metabolism	3-methoxytyramine sulfate
LC/MS Neg	Amino Acid	Tyrosine Metabolism	4-hydroxyphenylpyruvate	HMDB00707
LC/MS Neg	Amino Acid	Tyrosine Metabolism	dopamine 3-O-sulfate	HMDB06275
LC/MS Neg	Amino Acid	Tyrosine Metabolism	N-acetyltyrosine	HMDB00866
LC/MS Neg	Amino Acid	Tyrosine Metabolism	N-formylphenylalanine
LC/MS Neg	Amino Acid	Tyrosine Metabolism	p-cresol-glucuronide*	HMDB11686
LC/MS Neg	Amino Acid	Tyrosine Metabolism	phenol sulfate	HMDB60015
LC/MS Neg	Amino Acid	Tyrosine Metabolism	thyroxine	HMDB01918
LC/MS Neg	Amino Acid	Tyrosine Metabolism	tyramine O-sulfate	HMDB06409
LC/MS Neg	Amino Acid	Tyrosine Metabolism	vanillactate	HMDB00913
LC/MS Neg	Amino Acid	Tyrosine Metabolism	vanillic alcohol sulfate
LC/MS Neg	Amino Acid	Tyrosine Metabolism	vanillylmandelate (VMA)	HMDB00291
LC/MS Neg	Amino Acid	Urea cycle; Arginine and Proline Metabolism	citrulline	HMDB00904
LC/MS Neg	Amino Acid	Urea cycle; Arginine and Proline Metabolism	homocitrulline	HMDB00679
LC/MS Neg	Amino Acid	Urea cycle; Arginine and Proline Metabolism	N-acetylcitrulline	HMDB00856
LC/MS Neg	Amino Acid	Urea cycle; Arginine and Proline Metabolism	N-delta-acetylornithine
LC/MS Neg	Carbohydrate	Disaccharides and Oligosaccharides	sucrose	HMDB00258
LC/MS Neg	Carbohydrate	Glycogen Metabolism	maltotriose	HMDB01262
LC/MS Neg	Carbohydrate	Glycolysis, Gluconeogenesis, and Pyruvate Metabolism	1,5-anhydroglucitol (1,5-AG)	HMDB02712
LC/MS Neg	Carbohydrate	Glycolysis, Gluconeogenesis, and Pyruvate Metabolism	lactate	HMDB00190
LC/MS Neg	Cofactors and Vitamins	Ascorbate and Aldarate Metabolism	oxalate (ethanedioate)	HMDB02329
LC/MS Neg	Cofactors and Vitamins	Hemoglobin and Porphyrin Metabolism	heme	HMDB03178
LC/MS Neg	Cofactors and Vitamins	Nicotinate and Nicotinamide Metabolism	N1-Methyl-2-pyridone-5-carboxamide	HMDB04193
LC/MS Neg	Cofactors and Vitamins	Pantothenate and CoA Metabolism	pantothenate (Vitamin B5)	HMDB00210
LC/MS Neg	Cofactors and Vitamins	Tocopherol Metabolism	gamma-CEHC	HMDB01931
LC/MS Neg	Cofactors and Vitamins	Tocopherol Metabolism	gamma-CEHC glucuronide*
LC/MS Neg	Cofactors and Vitamins	Vitamin B6 Metabolism	pyridoxate	HMDB00017
LC/MS Neg	Energy	TCA Cycle	aconitate [cis or trans]
LC/MS Neg	Energy	TCA Cycle	malate	HMDB00156
LC/MS Neg	Lipid	Androgenic Steroids	16a-hydroxy DHEA 3-sulfate
LC/MS Neg	Lipid	Androgenic Steroids	androstenediol (3alpha, 17alpha) monosulfate (3)
LC/MS Neg	Lipid	Androgenic Steroids	androstenediol (3beta,17beta) disulfate (1)	HMDB03818
LC/MS Neg	Lipid	Androgenic Steroids	androstenediol (3beta,17beta) disulfate (2)	HMDB03818
LC/MS Neg	Lipid	Androgenic Steroids	androstenediol (3beta,17beta) monosulfate (1)	HMDB03818
LC/MS Neg	Lipid	Androgenic Steroids	androsterone sulfate	HMDB02759
LC/MS Neg	Lipid	Androgenic Steroids	dehydroisoandrosterone sulfate (DHEA-S)	HMDB01032
LC/MS Neg	Lipid	Androgenic Steroids	epiandrosterone sulfate
LC/MS Neg	Lipid	Corticosteroids	cortisol	HMDB00063
LC/MS Neg	Lipid	Corticosteroids	cortisone	HMDB02802
LC/MS Neg	Lipid	Endocannabinoid	linoleoyl ethanolamide	HMDB12252
LC/MS Neg	Lipid	Endocannabinoid	N-oleoyltaurine
LC/MS Neg	Lipid	Endocannabinoid	N-palmitoyltaurine
LC/MS Neg	Lipid	Endocannabinoid	N-stearoyltaurine
LC/MS Neg	Lipid	Endocannabinoid	oleoyl ethanolamide	HMDB02088
LC/MS Neg	Lipid	Endocannabinoid	palmitoyl ethanolamide	HMDB02100
LC/MS Neg	Lipid	Fatty Acid Metabolism (Acyl Glutamine)	hexanoylglutamine
LC/MS Neg	Lipid	Fatty Acid Metabolism(Acyl Carnitine)	cis-4-decenoylcarnitine (C10:1)
LC/MS Neg	Lipid	Fatty Acid Metabolism(Acyl Glycine)	N-palmitoylglycine	HMDB13034
LC/MS Neg	Lipid	Fatty Acid, Branched	17-methylstearate	HMDB37397
LC/MS Neg	Lipid	Fatty Acid, Dicarboxylate	3-carboxy-4-methyl-5-propyl-2-furanpropanoate (CMPF)	HMDB61112
LC/MS Neg	Lipid	Fatty Acid, Dicarboxylate	dodecanedioate (C12)	HMDB00623
LC/MS Neg	Lipid	Fatty Acid, Dicarboxylate	eicosanodioate
LC/MS Neg	Lipid	Fatty Acid, Dicarboxylate	hexadecanedioate (C16)	HMDB00672
LC/MS Neg	Lipid	Fatty Acid, Dicarboxylate	sebacate (decanedioate)	HMDB00792
LC/MS Neg	Lipid	Fatty Acid, Dicarboxylate	tetradecanedioate (C14)	HMDB00872
LC/MS Neg	Lipid	Fatty Acid, Dihydroxy	12,13-DiHOME	HMDB04705
LC/MS Neg	Lipid	Fatty Acid, Monohydroxy	13-HODE + 9-HODE
LC/MS Neg	Lipid	Fatty Acid, Monohydroxy	2-hydroxydecanoate
LC/MS Neg	Lipid	Fatty Acid, Monohydroxy	2-hydroxyoctanoate	HMDB02264
LC/MS Neg	Lipid	Fatty Acid, Monohydroxy	2-hydroxypalmitate	HMDB31057
LC/MS Neg	Lipid	Fatty Acid, Monohydroxy	2-hydroxystearate
LC/MS Neg	Lipid	Fatty Acid, Monohydroxy	3-hydroxydecanoate	HMDB02203
LC/MS Neg	Lipid	Fatty Acid, Monohydroxy	3-hydroxyhexanoate
LC/MS Neg	Lipid	Fatty Acid, Monohydroxy	3-hydroxylaurate	HMDB00387
LC/MS Neg	Lipid	Fatty Acid, Monohydroxy	3-hydroxyoctanoate	HMDB01954
LC/MS Neg	Lipid	Fatty Acid, Monohydroxy	3-hydroxysebacate	HMDB00350
LC/MS Neg	Lipid	Fatty Acid, Monohydroxy	5-hydroxyhexanoate	HMDB00525
LC/MS Neg	Lipid	Fatty Acid, Monohydroxy	alpha-hydroxycaproate	HMDB01624
LC/MS Neg	Lipid	Glycerolipid Metabolism	glycerol	HMDB00131
LC/MS Neg	Lipid	Medium Chain Fatty Acid	caprate (10:0)	HMDB00511
LC/MS Neg	Lipid	Medium Chain Fatty Acid	caproate (6:0)	HMDB00535
LC/MS Neg	Lipid	Medium Chain Fatty Acid	caprylate (8:0)	HMDB00482
LC/MS Neg	Lipid	Monoacylglycerol	1-linoleoylglycerol (18:2)
LC/MS Neg	Lipid	Monoacylglycerol	1-oleoylglycerol (18:1)	HMDB11567
LC/MS Neg	Lipid	Phospholipid Metabolism	phosphoethanolamine (PE)	HMDB00224
LC/MS Neg	Lipid	Pregnenolone Steroids	21-hydroxypregnenolone disulfate
LC/MS Neg	Lipid	Pregnenolone Steroids	pregnenolone sulfate	HMDB00774
LC/MS Neg	Lipid	Primary Bile Acid Metabolism	chenodeoxycholate	HMDB00518
LC/MS Neg	Lipid	Primary Bile Acid Metabolism	cholate	HMDB00619
LC/MS Neg	Lipid	Primary Bile Acid Metabolism	glycochenodeoxycholate	HMDB00637
LC/MS Neg	Lipid	Primary Bile Acid Metabolism	glycochenodeoxycholate glucuronide (1)
LC/MS Neg	Lipid	Primary Bile Acid Metabolism	glycochenodeoxycholate sulfate
LC/MS Neg	Lipid	Primary Bile Acid Metabolism	glycocholate	HMDB00138
LC/MS Neg	Lipid	Primary Bile Acid Metabolism	tauro-beta-muricholate	HMDB00932
LC/MS Neg	Lipid	Primary Bile Acid Metabolism	taurochenodeoxycholate	HMDB00951
LC/MS Neg	Lipid	Primary Bile Acid Metabolism	taurocholate	HMDB00036
LC/MS Neg	Lipid	Progestin Steroids	5alpha-pregnan-3(alpha or beta),20beta-diol disulfate
LC/MS Neg	Lipid	Progestin Steroids	5alpha-pregnan-3beta,20alpha-diol disulfate
LC/MS Neg	Lipid	Progestin Steroids	5alpha-pregnan-3beta,20alpha-diol monosulfate (2)
LC/MS Neg	Lipid	Progestin Steroids	5alpha-pregnan-3beta,20beta-diol monosulfate (1)
LC/MS Neg	Lipid	Progestin Steroids	pregn steroid monosulfate C21H34O5S*
LC/MS Neg	Lipid	Progestin Steroids	pregnen-diol disulfate*
LC/MS Neg	Lipid	Secondary Bile Acid Metabolism	3b-hydroxy-5-cholenoic acid	HMDB00308
LC/MS Neg	Lipid	Secondary Bile Acid Metabolism	glycocholenate sulfate*
LC/MS Neg	Lipid	Secondary Bile Acid Metabolism	glycodeoxycholate sulfate
LC/MS Neg	Lipid	Secondary Bile Acid Metabolism	glycohyocholate
LC/MS Neg	Lipid	Secondary Bile Acid Metabolism	glycolithocholate sulfate*	HMDB02639
LC/MS Neg	Lipid	Secondary Bile Acid Metabolism	glycoursodeoxycholate	HMDB00708
LC/MS Neg	Lipid	Secondary Bile Acid Metabolism	hyocholate	HMDB00760
LC/MS Neg	Lipid	Secondary Bile Acid Metabolism	isoursodeoxycholate	HMDB00686
LC/MS Neg	Lipid	Secondary Bile Acid Metabolism	taurocholenate sulfate
LC/MS Neg	Lipid	Secondary Bile Acid Metabolism	taurolithocholate 3-sulfate	HMDB02580
LC/MS Neg	Lipid	Secondary Bile Acid Metabolism	tauroursodeoxycholate	HMDB00874
LC/MS Neg	Lipid	Secondary Bile Acid Metabolism	ursodeoxycholate	HMDB00946
LC/MS Neg	Lipid	Sterol	3beta-hydroxy-5-cholestenoate
LC/MS Neg	Lipid	Sterol	7-HOCA	HMDB12458
LC/MS Neg	Nucleotide	Purine Metabolism, (Hypo)Xanthine/Inosine containing	inosine	HMDB00195
LC/MS Neg	Nucleotide	Purine Metabolism, (Hypo)Xanthine/Inosine containing	urate	HMDB00289
LC/MS Neg	Nucleotide	Purine Metabolism, Adenine containing	N6-carbamoylthreonyladenosine	HMDB41623
LC/MS Neg	Nucleotide	Purine Metabolism, Guanine containing	guanosine	HMDB00133
LC/MS Neg	Nucleotide	Pyrimidine Metabolism, Thymine containing	5,6-dihydrothymine	HMDB00079
LC/MS Neg	Nucleotide	Pyrimidine Metabolism, Uracil containing	5-methyluridine (ribothymidine)	HMDB00884
LC/MS Neg	Nucleotide	Pyrimidine Metabolism, Uracil containing	N-acetyl-beta-alanine
LC/MS Neg	Nucleotide	Pyrimidine Metabolism, Uracil containing	pseudouridine	HMDB00767
LC/MS Neg	Nucleotide	Pyrimidine Metabolism, Uracil containing	uracil	HMDB00300
LC/MS Neg	Nucleotide	Pyrimidine Metabolism, Uracil containing	uridine	HMDB00296
LC/MS Neg	Nucleotide	Pyrimidine Metabolism, Uracil containing	uridine 3'-monophosphate (3'-UMP)
LC/MS Neg	Peptide	Acetylated Peptides	phenylacetylglutamine	HMDB06344
LC/MS Neg	Peptide	Acetylated Peptides	phenylacetylglycine	HMDB00821
LC/MS Neg	Peptide	Dipeptide	isoleucylglycine	HMDB28907
LC/MS Neg	Peptide	Dipeptide	valylglycine	HMDB29127
LC/MS Neg	Peptide	Dipeptide Derivative	anserine	HMDB00194
LC/MS Neg	Peptide	Dipeptide Derivative	N-acetylcarnosine	HMDB12881
LC/MS Neg	Peptide	Gamma-glutamyl Amino Acid	gamma-glutamylisoleucine*	HMDB11170
LC/MS Neg	Peptide	Gamma-glutamyl Amino Acid	gamma-glutamylleucine	HMDB11171
LC/MS Neg	Peptide	Gamma-glutamyl Amino Acid	gamma-glutamylphenylalanine	HMDB00594
LC/MS Neg	Peptide	Gamma-glutamyl Amino Acid	gamma-glutamyltryptophan	HMDB29160
LC/MS Neg	Peptide	Gamma-glutamyl Amino Acid	gamma-glutamyltyrosine	HMDB11741
LC/MS Neg	Xenobiotics	Bacterial/Fungal	tartronate (hydroxymalonate)	HMDB35227
LC/MS Neg	Xenobiotics	Benzoate Metabolism	2-hydroxyhippurate (salicylurate)	HMDB00840
LC/MS Neg	Xenobiotics	Benzoate Metabolism	3-(3-hydroxyphenyl)propionate	HMDB00375
LC/MS Neg	Xenobiotics	Benzoate Metabolism	3-hydroxyhippurate	HMDB06116
LC/MS Neg	Xenobiotics	Benzoate Metabolism	3-methoxycatechol sulfate (1)
LC/MS Neg	Xenobiotics	Benzoate Metabolism	3-methyl catechol sulfate (1)
LC/MS Neg	Xenobiotics	Benzoate Metabolism	4-ethylphenyl sulfate
LC/MS Neg	Xenobiotics	Benzoate Metabolism	4-hydroxyhippurate	HMDB13678
LC/MS Neg	Xenobiotics	Benzoate Metabolism	4-methylcatechol sulfate
LC/MS Neg	Xenobiotics	Benzoate Metabolism	4-vinylphenol sulfate	HMDB04072
LC/MS Neg	Xenobiotics	Benzoate Metabolism	benzoate	HMDB01870
LC/MS Neg	Xenobiotics	Benzoate Metabolism	catechol sulfate	HMDB59724
LC/MS Neg	Xenobiotics	Benzoate Metabolism	hippurate	HMDB00714
LC/MS Neg	Xenobiotics	Benzoate Metabolism	methyl-4-hydroxybenzoate sulfate
LC/MS Neg	Xenobiotics	Benzoate Metabolism	o-cresol sulfate
LC/MS Neg	Xenobiotics	Benzoate Metabolism	O-methylcatechol sulfate	HMDB60013
LC/MS Neg	Xenobiotics	Benzoate Metabolism	p-cresol sulfate	HMDB11635
LC/MS Neg	Xenobiotics	Benzoate Metabolism	propyl 4-hydroxybenzoate sulfate
LC/MS Neg	Xenobiotics	Chemical	1,2,3-benzenetriol sulfate (2)
LC/MS Neg	Xenobiotics	Chemical	2-aminophenol sulfate	HMDB61116
LC/MS Neg	Xenobiotics	Chemical	3-hydroxypyridine sulfate
LC/MS Neg	Xenobiotics	Chemical	4-hydroxychlorothalonil
LC/MS Neg	Xenobiotics	Chemical	6-hydroxyindole sulfate
LC/MS Neg	Xenobiotics	Chemical	O-sulfo-L-tyrosine
LC/MS Neg	Xenobiotics	Chemical	sulfate*	HMDB01448
LC/MS Neg	Xenobiotics	Drug	4-acetylphenyl sulfate
LC/MS Neg	Xenobiotics	Drug	hydroquinone sulfate	HMDB02434
LC/MS Neg	Xenobiotics	Food Component/Plant	2,8-quinolinediol sulfate
LC/MS Neg	Xenobiotics	Food Component/Plant	3,4-methyleneheptanoate
LC/MS Neg	Xenobiotics	Food Component/Plant	4-allylphenol sulfate
LC/MS Neg	Xenobiotics	Food Component/Plant	4-vinylguaiacol sulfate
LC/MS Neg	Xenobiotics	Food Component/Plant	eugenol sulfate
LC/MS Neg	Xenobiotics	Food Component/Plant	ferulic acid 4-sulfate	HMDB29200
LC/MS Neg	Xenobiotics	Food Component/Plant	methyl glucopyranoside (alpha + beta)
LC/MS Neg	Xenobiotics	Food Component/Plant	N-(2-furoyl)glycine	HMDB00439
LC/MS Neg	Xenobiotics	Food Component/Plant	pyrraline	HMDB33143
LC/MS Neg	Xenobiotics	Food Component/Plant	tartarate	HMDB00956
LC/MS Neg	Xenobiotics	Food Component/Plant	thymol sulfate	HMDB01878
LC/MS Neg	Xenobiotics	Food Component/Plant	umbelliferone sulfate
LC/MS Polar	Amino Acid	Alanine and Aspartate Metabolism	N-acetylalanine	HMDB00766
LC/MS Polar	Amino Acid	Alanine and Aspartate Metabolism	N-acetylaspartate (NAA)	HMDB00812
LC/MS Polar	Amino Acid	Glutamate Metabolism	N-acetylglutamine	HMDB06029
LC/MS Polar	Amino Acid	Glutathione Metabolism	2-hydroxybutyrate/2-hydroxyisobutyrate
LC/MS Polar	Amino Acid	Glycine, Serine and Threonine Metabolism	N-acetylserine	HMDB02931
LC/MS Polar	Amino Acid	Histidine Metabolism	hydantoin-5-propionic acid	HMDB01212
LC/MS Polar	Amino Acid	Leucine, Isoleucine and Valine Metabolism	3-hydroxyisobutyrate	HMDB00336
LC/MS Polar	Amino Acid	Leucine, Isoleucine and Valine Metabolism	3-methylglutaconate	HMDB00522
LC/MS Polar	Amino Acid	Leucine, Isoleucine and Valine Metabolism	alpha-hydroxyisovalerate	HMDB00407
LC/MS Polar	Amino Acid	Leucine, Isoleucine and Valine Metabolism	ethylmalonate	HMDB00622
LC/MS Polar	Amino Acid	Leucine, Isoleucine and Valine Metabolism	methylsuccinate	HMDB01844
LC/MS Polar	Amino Acid	Lysine Metabolism	2-aminoadipate	HMDB00510
LC/MS Polar	Amino Acid	Methionine, Cysteine, SAM and Taurine Metabolism	alpha-ketobutyrate	HMDB00005
LC/MS Polar	Amino Acid	Methionine, Cysteine, SAM and Taurine Metabolism	cysteine s-sulfate	HMDB00731
LC/MS Polar	Amino Acid	Phenylalanine Metabolism	phenylpyruvate	HMDB00205
LC/MS Polar	Amino Acid	Tryptophan Metabolism	N-formylanthranilic acid	HMDB04089
LC/MS Polar	Amino Acid	Tyrosine Metabolism	2-hydroxyphenylacetate	HMDB00669
LC/MS Polar	Amino Acid	Tyrosine Metabolism	gentisate	HMDB00152
LC/MS Polar	Carbohydrate	Aminosugar Metabolism	erythronate*	HMDB00613
LC/MS Polar	Carbohydrate	Aminosugar Metabolism	glucuronate	HMDB00127
LC/MS Polar	Carbohydrate	Fructose, Mannose and Galactose Metabolism	fructose	HMDB00660
LC/MS Polar	Carbohydrate	Fructose, Mannose and Galactose Metabolism	galactonate	HMDB00565
LC/MS Polar	Carbohydrate	Fructose, Mannose and Galactose Metabolism	mannitol/sorbitol	HMDB00247
LC/MS Polar	Carbohydrate	Fructose, Mannose and Galactose Metabolism	mannose	HMDB00169
LC/MS Polar	Carbohydrate	Glycogen Metabolism	maltose	HMDB00163
LC/MS Polar	Carbohydrate	Glycolysis, Gluconeogenesis, and Pyruvate Metabolism	glucose	HMDB00122
LC/MS Polar	Carbohydrate	Glycolysis, Gluconeogenesis, and Pyruvate Metabolism	glycerate	HMDB00139
LC/MS Polar	Carbohydrate	Glycolysis, Gluconeogenesis, and Pyruvate Metabolism	pyruvate	HMDB00243
LC/MS Polar	Carbohydrate	Pentose Metabolism	arabitol/xylitol
LC/MS Polar	Carbohydrate	Pentose Metabolism	arabonate/xylonate
LC/MS Polar	Carbohydrate	Pentose Metabolism	ribitol	HMDB00508
LC/MS Polar	Carbohydrate	Pentose Metabolism	ribonate (ribonolactone)	HMDB00867
LC/MS Polar	Carbohydrate	Pentose Metabolism	xylose	HMDB00098
LC/MS Polar	Cofactors and Vitamins	Ascorbate and Aldarate Metabolism	gulonate*	HMDB03290
LC/MS Polar	Cofactors and Vitamins	Ascorbate and Aldarate Metabolism	threonate	HMDB00943
LC/MS Polar	Energy	TCA Cycle	alpha-ketoglutarate	HMDB00208
LC/MS Polar	Energy	TCA Cycle	fumarate	HMDB00134
LC/MS Polar	Energy	TCA Cycle	succinate	HMDB00254
LC/MS Polar	Lipid	Fatty Acid, Dicarboxylate	adipate	HMDB00448
LC/MS Polar	Lipid	Fatty Acid, Dicarboxylate	azelate (nonanedioate; C9)	HMDB00784
LC/MS Polar	Lipid	Fatty Acid, Dicarboxylate	glutarate (pentanedioate)	HMDB00661
LC/MS Polar	Lipid	Fatty Acid, Dicarboxylate	maleate	HMDB00176
LC/MS Polar	Lipid	Fatty Acid, Dicarboxylate	suberate (octanedioate)	HMDB00893
LC/MS Polar	Lipid	Glycerolipid Metabolism	glycerophosphoglycerol
LC/MS Polar	Lipid	Inositol Metabolism	myo-inositol	HMDB00211
LC/MS Polar	Lipid	Ketone Bodies	3-hydroxybutyrate (BHBA)	HMDB00357
LC/MS Polar	Lipid	Mevalonate Metabolism	3-hydroxy-3-methylglutarate	HMDB00355
LC/MS Polar	Lipid	Phospholipid Metabolism	glycerophosphoinositol*
LC/MS Polar	Nucleotide	Purine Metabolism, (Hypo)Xanthine/Inosine containing	allantoin	HMDB00462
LC/MS Polar	Nucleotide	Purine Metabolism, (Hypo)Xanthine/Inosine containing	xanthine	HMDB00292
LC/MS Polar	Nucleotide	Pyrimidine Metabolism, Orotate containing	orotate	HMDB00226
LC/MS Polar	Nucleotide	Pyrimidine Metabolism, Orotate containing	orotidine	HMDB00788
LC/MS Polar	Xenobiotics	Chemical	perfluorooctanesulfonic acid (PFOS)	HMDB59586
LC/MS Polar	Xenobiotics	Chemical	succinimide
LC/MS Polar	Xenobiotics	Drug	salicylate	HMDB01895
LC/MS Polar	Xenobiotics	Food Component/Plant	2,3-dihydroxyisovalerate	HMDB12141
LC/MS Polar	Xenobiotics	Food Component/Plant	erythritol	HMDB02994
LC/MS Polar	Xenobiotics	Food Component/Plant	gluconate	HMDB00625
LC/MS Polar	Xenobiotics	Food Component/Plant	quinate	HMDB03072
LC/MS Polar	Xenobiotics	Xanthine Metabolism	caffeic acid sulfate	HMDB41708
LC/MS Pos Early	Amino Acid	Alanine and Aspartate Metabolism	alanine	HMDB00161
LC/MS Pos Early	Amino Acid	Alanine and Aspartate Metabolism	asparagine	HMDB00168
LC/MS Pos Early	Amino Acid	Alanine and Aspartate Metabolism	aspartate	HMDB00191
LC/MS Pos Early	Amino Acid	Creatine Metabolism	creatine	HMDB00064
LC/MS Pos Early	Amino Acid	Creatine Metabolism	creatinine	HMDB00562
LC/MS Pos Early	Amino Acid	Creatine Metabolism	guanidinoacetate	HMDB00128
LC/MS Pos Early	Amino Acid	Glutamate Metabolism	carboxyethyl-GABA	HMDB02201
LC/MS Pos Early	Amino Acid	Glutamate Metabolism	glutamate	HMDB00148
LC/MS Pos Early	Amino Acid	Glutamate Metabolism	glutamate, gamma-methyl ester	HMDB61715
LC/MS Pos Early	Amino Acid	Glutamate Metabolism	glutamine	HMDB00641
LC/MS Pos Early	Amino Acid	Glutamate Metabolism	N-acetyl-aspartyl-glutamate (NAAG)	HMDB01067
LC/MS Pos Early	Amino Acid	Glutamate Metabolism	N-acetylglutamate	HMDB01138
LC/MS Pos Early	Amino Acid	Glutamate Metabolism	pyroglutamine*
LC/MS Pos Early	Amino Acid	Glutamate Metabolism	S-1-pyrroline-5-carboxylate	HMDB01301
LC/MS Pos Early	Amino Acid	Glutathione Metabolism	2-aminobutyrate	HMDB00650
LC/MS Pos Early	Amino Acid	Glutathione Metabolism	cysteine-glutathione disulfide	HMDB00656
LC/MS Pos Early	Amino Acid	Glutathione Metabolism	cysteinylglycine	HMDB00078
LC/MS Pos Early	Amino Acid	Glycine, Serine and Threonine Metabolism	betaine	HMDB00043
LC/MS Pos Early	Amino Acid	Glycine, Serine and Threonine Metabolism	dimethylglycine	HMDB00092
LC/MS Pos Early	Amino Acid	Glycine, Serine and Threonine Metabolism	glycine	HMDB00123
LC/MS Pos Early	Amino Acid	Glycine, Serine and Threonine Metabolism	N-acetylglycine	HMDB00532
LC/MS Pos Early	Amino Acid	Glycine, Serine and Threonine Metabolism	sarcosine	HMDB00271
LC/MS Pos Early	Amino Acid	Glycine, Serine and Threonine Metabolism	serine	HMDB00187
LC/MS Pos Early	Amino Acid	Glycine, Serine and Threonine Metabolism	threonine	HMDB00167
LC/MS Pos Early	Amino Acid	Guanidino and Acetamido Metabolism	4-guanidinobutanoate	HMDB03464
LC/MS Pos Early	Amino Acid	Histidine Metabolism	1-methylhistidine	HMDB00001
LC/MS Pos Early	Amino Acid	Histidine Metabolism	1-methylimidazoleacetate	HMDB02820
LC/MS Pos Early	Amino Acid	Histidine Metabolism	carnosine	HMDB00033
LC/MS Pos Early	Amino Acid	Histidine Metabolism	imidazole lactate	HMDB02320
LC/MS Pos Early	Amino Acid	Histidine Metabolism	imidazole propionate	HMDB02271
LC/MS Pos Early	Amino Acid	Histidine Metabolism	N-acetyl-1-methylhistidine*
LC/MS Pos Early	Amino Acid	Histidine Metabolism	N-acetylhistidine	HMDB32055
LC/MS Pos Early	Amino Acid	Histidine Metabolism	trans-urocanate	HMDB00301
LC/MS Pos Early	Amino Acid	Leucine, Isoleucine and Valine Metabolism	2-methylbutyroylcarnitine (C5)	HMDB00378
LC/MS Pos Early	Amino Acid	Leucine, Isoleucine and Valine Metabolism	3-methylglutarylcarnitine (2)	HMDB00552
LC/MS Pos Early	Amino Acid	Leucine, Isoleucine and Valine Metabolism	isobutyrylcarnitine (C4)	HMDB00736
LC/MS Pos Early	Amino Acid	Leucine, Isoleucine and Valine Metabolism	isoleucine	HMDB00172
LC/MS Pos Early	Amino Acid	Leucine, Isoleucine and Valine Metabolism	isovalerylcarnitine (C5)	HMDB00688
LC/MS Pos Early	Amino Acid	Leucine, Isoleucine and Valine Metabolism	leucine	HMDB00687
LC/MS Pos Early	Amino Acid	Leucine, Isoleucine and Valine Metabolism	tiglyl carnitine (C5)	HMDB02366
LC/MS Pos Early	Amino Acid	Lysine Metabolism	5-hydroxylysine	HMDB00450
LC/MS Pos Early	Amino Acid	Lysine Metabolism	glutaroylcarnitine (C5)	HMDB13130
LC/MS Pos Early	Amino Acid	Lysine Metabolism	lysine	HMDB00182
LC/MS Pos Early	Amino Acid	Lysine Metabolism	N6,N6,N6-trimethyllysine	HMDB01325
LC/MS Pos Early	Amino Acid	Lysine Metabolism	N-acetyl-cadaverine	HMDB02284
LC/MS Pos Early	Amino Acid	Lysine Metabolism	pipecolate	HMDB00070
LC/MS Pos Early	Amino Acid	Methionine, Cysteine, SAM and Taurine Metabolism	cystathionine	HMDB00099
LC/MS Pos Early	Amino Acid	Methionine, Cysteine, SAM and Taurine Metabolism	cysteine	HMDB00574
LC/MS Pos Early	Amino Acid	Methionine, Cysteine, SAM and Taurine Metabolism	cystine	HMDB00192
LC/MS Pos Early	Amino Acid	Methionine, Cysteine, SAM and Taurine Metabolism	hypotaurine	HMDB00965
LC/MS Pos Early	Amino Acid	Methionine, Cysteine, SAM and Taurine Metabolism	methionine	HMDB00696
LC/MS Pos Early	Amino Acid	Methionine, Cysteine, SAM and Taurine Metabolism	methionine sulfone
LC/MS Pos Early	Amino Acid	Methionine, Cysteine, SAM and Taurine Metabolism	methionine sulfoxide	HMDB02005
LC/MS Pos Early	Amino Acid	Methionine, Cysteine, SAM and Taurine Metabolism	S-methylcysteine sulfoxide	HMDB29432
LC/MS Pos Early	Amino Acid	Methionine, Cysteine, SAM and Taurine Metabolism	taurine	HMDB00251
LC/MS Pos Early	Amino Acid	Phenylalanine Metabolism	phenylalanine	HMDB00159
LC/MS Pos Early	Amino Acid	Polyamine Metabolism	4-acetamidobutanoate	HMDB03681
LC/MS Pos Early	Amino Acid	Polyamine Metabolism	5-methylthioadenosine (MTA)	HMDB01173
LC/MS Pos Early	Amino Acid	Polyamine Metabolism	N-acetylputrescine	HMDB02064
LC/MS Pos Early	Amino Acid	Tryptophan Metabolism	C-glycosyltryptophan
LC/MS Pos Early	Amino Acid	Tryptophan Metabolism	kynurenine	HMDB00684
LC/MS Pos Early	Amino Acid	Tryptophan Metabolism	serotonin	HMDB00259
LC/MS Pos Early	Amino Acid	Tryptophan Metabolism	tryptophan	HMDB00929
LC/MS Pos Early	Amino Acid	Tryptophan Metabolism	tryptophan betaine	HMDB61115
LC/MS Pos Early	Amino Acid	Tryptophan Metabolism	xanthurenate	HMDB00881
LC/MS Pos Early	Amino Acid	Tyrosine Metabolism	3-methoxytyrosine	HMDB01434
LC/MS Pos Early	Amino Acid	Tyrosine Metabolism	tyrosine	HMDB00158
LC/MS Pos Early	Amino Acid	Urea cycle; Arginine and Proline Metabolism	2-oxoarginine*	HMDB04225
LC/MS Pos Early	Amino Acid	Urea cycle; Arginine and Proline Metabolism	argininate*	HMDB03148
LC/MS Pos Early	Amino Acid	Urea cycle; Arginine and Proline Metabolism	arginine	HMDB00517
LC/MS Pos Early	Amino Acid	Urea cycle; Arginine and Proline Metabolism	dimethylarginine (ADMA + SDMA)	HMDB01539
LC/MS Pos Early	Amino Acid	Urea cycle; Arginine and Proline Metabolism	homoarginine	HMDB00670
LC/MS Pos Early	Amino Acid	Urea cycle; Arginine and Proline Metabolism	hydroxyproline	HMDB00725
LC/MS Pos Early	Amino Acid	Urea cycle; Arginine and Proline Metabolism	N-acetylarginine	HMDB04620
LC/MS Pos Early	Amino Acid	Urea cycle; Arginine and Proline Metabolism	N-acetylproline
LC/MS Pos Early	Amino Acid	Urea cycle; Arginine and Proline Metabolism	N-alpha-acetylornithine	HMDB03357
LC/MS Pos Early	Amino Acid	Urea cycle; Arginine and Proline Metabolism	N-methylproline
LC/MS Pos Early	Amino Acid	Urea cycle; Arginine and Proline Metabolism	ornithine	HMDB03374
LC/MS Pos Early	Amino Acid	Urea cycle; Arginine and Proline Metabolism	proline	HMDB00162
LC/MS Pos Early	Amino Acid	Urea cycle; Arginine and Proline Metabolism	prolylhydroxyproline	HMDB06695
LC/MS Pos Early	Amino Acid	Urea cycle; Arginine and Proline Metabolism	urea	HMDB00294
LC/MS Pos Early	Carbohydrate	Aminosugar Metabolism	N-acetylneuraminate	HMDB00230
LC/MS Pos Early	Carbohydrate	Glycolysis, Gluconeogenesis, and Pyruvate Metabolism	3-phosphoglycerate	HMDB00807
LC/MS Pos Early	Cofactors and Vitamins	Nicotinate and Nicotinamide Metabolism	1-methylnicotinamide	HMDB00699
LC/MS Pos Early	Cofactors and Vitamins	Nicotinate and Nicotinamide Metabolism	nicotinamide	HMDB01406
LC/MS Pos Early	Cofactors and Vitamins	Nicotinate and Nicotinamide Metabolism	quinolinate	HMDB00232
LC/MS Pos Early	Cofactors and Vitamins	Nicotinate and Nicotinamide Metabolism	trigonelline (N'-methylnicotinate)	HMDB00875
LC/MS Pos Early	Energy	Oxidative Phosphorylation	phosphate	HMDB01429
LC/MS Pos Early	Energy	TCA Cycle	succinylcarnitine (C4)	HMDB61717
LC/MS Pos Early	Lipid	Carnitine Metabolism	carnitine	HMDB00062
LC/MS Pos Early	Lipid	Carnitine Metabolism	deoxycarnitine	HMDB01161
LC/MS Pos Early	Lipid	Fatty Acid Metabolism (also BCAA Metabolism)	butyrylcarnitine (C4)	HMDB02013
LC/MS Pos Early	Lipid	Fatty Acid Metabolism (also BCAA Metabolism)	propionylcarnitine (C3)	HMDB00824
LC/MS Pos Early	Lipid	Fatty Acid Metabolism (also BCAA Metabolism)	propionylglycine (C3)	HMDB00783
LC/MS Pos Early	Lipid	Fatty Acid Metabolism(Acyl Carnitine)	3-hydroxybutyrylcarnitine (1)	HMDB13127
LC/MS Pos Early	Lipid	Fatty Acid Metabolism(Acyl Carnitine)	3-hydroxybutyrylcarnitine (2)	HMDB13127
LC/MS Pos Early	Lipid	Fatty Acid Metabolism(Acyl Carnitine)	acetylcarnitine (C2)	HMDB00201
LC/MS Pos Early	Lipid	Fatty Acid Metabolism(Acyl Carnitine)	adipoylcarnitine (C6-DC)	HMDB61677
LC/MS Pos Early	Lipid	Fatty Acid Metabolism(Acyl Carnitine)	hexanoylcarnitine (C6)	HMDB00705
LC/MS Pos Early	Lipid	Fatty Acid Metabolism(Acyl Carnitine)	pimeloylcarnitine/3-methyladipoylcarnitine (C7-DC)
LC/MS Pos Early	Lipid	Fatty Acid Synthesis	malonylcarnitine	HMDB02095
LC/MS Pos Early	Lipid	Fatty Acid, Amino	2-aminoheptanoate
LC/MS Pos Early	Lipid	Fatty Acid, Dicarboxylate	2-hydroxyglutarate	HMDB00606
LC/MS Pos Early	Lipid	Phospholipid Metabolism	choline	HMDB00097
LC/MS Pos Early	Lipid	Phospholipid Metabolism	glycerophosphoethanolamine	HMDB00114
LC/MS Pos Early	Lipid	Phospholipid Metabolism	glycerophosphorylcholine (GPC)	HMDB00086
LC/MS Pos Early	Lipid	Phospholipid Metabolism	phosphocholine	HMDB01565
LC/MS Pos Early	Lipid	Phospholipid Metabolism	trimethylamine N-oxide	HMDB00925
LC/MS Pos Early	Nucleotide	Purine Metabolism, (Hypo)Xanthine/Inosine containing	hypoxanthine	HMDB00157
LC/MS Pos Early	Nucleotide	Purine Metabolism, (Hypo)Xanthine/Inosine containing	inosine 5'-monophosphate (IMP)	HMDB00175
LC/MS Pos Early	Nucleotide	Purine Metabolism, (Hypo)Xanthine/Inosine containing	N1-methylinosine	HMDB02721
LC/MS Pos Early	Nucleotide	Purine Metabolism, Adenine containing	1-methyladenosine	HMDB03331
LC/MS Pos Early	Nucleotide	Purine Metabolism, Adenine containing	adenine	HMDB00034
LC/MS Pos Early	Nucleotide	Purine Metabolism, Adenine containing	AMP	HMDB00045
LC/MS Pos Early	Nucleotide	Purine Metabolism, Guanine containing	7-methylguanine	HMDB00897
LC/MS Pos Early	Nucleotide	Purine Metabolism, Guanine containing	N2,N2-dimethylguanosine	HMDB04824
LC/MS Pos Early	Nucleotide	Pyrimidine Metabolism, Cytidine containing	2'-O-methylcytidine
LC/MS Pos Early	Nucleotide	Pyrimidine Metabolism, Cytidine containing	CMP	HMDB00095
LC/MS Pos Early	Nucleotide	Pyrimidine Metabolism, Cytidine containing	cytidine	HMDB00089
LC/MS Pos Early	Nucleotide	Pyrimidine Metabolism, Cytidine containing	N4-acetylcytidine	HMDB05923
LC/MS Pos Early	Nucleotide	Pyrimidine Metabolism, Thymine containing	3-aminoisobutyrate	HMDB03911
LC/MS Pos Early	Nucleotide	Pyrimidine Metabolism, Uracil containing	3-ureidopropionate	HMDB00026
LC/MS Pos Early	Nucleotide	Pyrimidine Metabolism, Uracil containing	beta-alanine	HMDB00056
LC/MS Pos Early	Peptide	Acetylated Peptides	phenylacetylcarnitine
LC/MS Pos Early	Peptide	Dipeptide	leucylglycine	HMDB28929
LC/MS Pos Early	Peptide	Dipeptide	prolylglycine	HMDB11178
LC/MS Pos Early	Peptide	Gamma-glutamyl Amino Acid	gamma-glutamylalanine	HMDB29142
LC/MS Pos Early	Peptide	Gamma-glutamyl Amino Acid	gamma-glutamyl-alpha-lysine
LC/MS Pos Early	Peptide	Gamma-glutamyl Amino Acid	gamma-glutamyl-epsilon-lysine	HMDB03869
LC/MS Pos Early	Peptide	Gamma-glutamyl Amino Acid	gamma-glutamylglutamate	HMDB11737
LC/MS Pos Early	Peptide	Gamma-glutamyl Amino Acid	gamma-glutamylglutamine	HMDB11738
LC/MS Pos Early	Peptide	Gamma-glutamyl Amino Acid	gamma-glutamylglycine	HMDB11667
LC/MS Pos Early	Peptide	Gamma-glutamyl Amino Acid	gamma-glutamylhistidine
LC/MS Pos Early	Peptide	Gamma-glutamyl Amino Acid	gamma-glutamylmethionine	HMDB29155
LC/MS Pos Early	Peptide	Gamma-glutamyl Amino Acid	gamma-glutamylthreonine	HMDB29159
LC/MS Pos Early	Peptide	Gamma-glutamyl Amino Acid	gamma-glutamylvaline	HMDB11172
LC/MS Pos Early	Xenobiotics	Bacterial/Fungal	N-methylpipecolate
LC/MS Pos Early	Xenobiotics	Chemical	dimethyl sulfone	HMDB04983
LC/MS Pos Early	Xenobiotics	Chemical	EDTA	HMDB15109
LC/MS Pos Early	Xenobiotics	Chemical	HEPES
LC/MS Pos Early	Xenobiotics	Chemical	iminodiacetate (IDA)	HMDB11753
LC/MS Pos Early	Xenobiotics	Chemical	thioproline
LC/MS Pos Early	Xenobiotics	Food Component/Plant	2-piperidinone	HMDB11749
LC/MS Pos Early	Xenobiotics	Food Component/Plant	cinnamoylglycine	HMDB11621
LC/MS Pos Early	Xenobiotics	Food Component/Plant	ergothioneine	HMDB03045
LC/MS Pos Early	Xenobiotics	Food Component/Plant	homostachydrine*	HMDB33433
LC/MS Pos Early	Xenobiotics	Food Component/Plant	S-allylcysteine	HMDB34323
LC/MS Pos Early	Xenobiotics	Food Component/Plant	stachydrine	HMDB04827
LC/MS Pos Early	Xenobiotics	Xanthine Metabolism	theobromine	HMDB02825
LC/MS Pos Early	Xenobiotics	Xanthine Metabolism	theophylline	HMDB01889
LC/MS Pos Late	Amino Acid	Polyamine Metabolism	spermidine	HMDB01257
LC/MS Pos Late	Cofactors and Vitamins	Hemoglobin and Porphyrin Metabolism	bilirubin	HMDB00054
LC/MS Pos Late	Cofactors and Vitamins	Hemoglobin and Porphyrin Metabolism	bilirubin (E,E)*
LC/MS Pos Late	Cofactors and Vitamins	Hemoglobin and Porphyrin Metabolism	bilirubin (E,Z or Z,E)*	HMDB00488
LC/MS Pos Late	Cofactors and Vitamins	Hemoglobin and Porphyrin Metabolism	biliverdin	HMDB01008
LC/MS Pos Late	Cofactors and Vitamins	Tocopherol Metabolism	alpha-tocopherol	HMDB01893
LC/MS Pos Late	Cofactors and Vitamins	Tocopherol Metabolism	gamma-tocopherol/beta-tocopherol
LC/MS Pos Late	Cofactors and Vitamins	Vitamin A Metabolism	retinol (Vitamin A)	HMDB00305
LC/MS Pos Late	Energy	TCA Cycle	citrate	HMDB00094
LC/MS Pos Late	Lipid	Fatty Acid Metabolism (Acyl Choline)	arachidonoylcholine
LC/MS Pos Late	Lipid	Fatty Acid Metabolism (Acyl Choline)	linoleoylcholine*
LC/MS Pos Late	Lipid	Fatty Acid Metabolism (Acyl Choline)	oleoylcholine
LC/MS Pos Late	Lipid	Fatty Acid Metabolism(Acyl Carnitine)	adrenoylcarnitine (C22:4)*
LC/MS Pos Late	Lipid	Fatty Acid Metabolism(Acyl Carnitine)	arachidonoylcarnitine (C20:4)
LC/MS Pos Late	Lipid	Fatty Acid Metabolism(Acyl Carnitine)	arachidoylcarnitine (C20)*	HMDB06460
LC/MS Pos Late	Lipid	Fatty Acid Metabolism(Acyl Carnitine)	behenoylcarnitine (C22)*
LC/MS Pos Late	Lipid	Fatty Acid Metabolism(Acyl Carnitine)	cerotoylcarnitine (C26)*	HMDB06347
LC/MS Pos Late	Lipid	Fatty Acid Metabolism(Acyl Carnitine)	decanoylcarnitine (C10)	HMDB00651
LC/MS Pos Late	Lipid	Fatty Acid Metabolism(Acyl Carnitine)	dihomo-linolenoylcarnitine (20:3n3 or 6)*
LC/MS Pos Late	Lipid	Fatty Acid Metabolism(Acyl Carnitine)	dihomo-linoleoylcarnitine (C20:2)*
LC/MS Pos Late	Lipid	Fatty Acid Metabolism(Acyl Carnitine)	docosahexaenoylcarnitine (C22:6)*
LC/MS Pos Late	Lipid	Fatty Acid Metabolism(Acyl Carnitine)	eicosenoylcarnitine (C20:1)*
LC/MS Pos Late	Lipid	Fatty Acid Metabolism(Acyl Carnitine)	laurylcarnitine (C12)	HMDB02250
LC/MS Pos Late	Lipid	Fatty Acid Metabolism(Acyl Carnitine)	lignoceroylcarnitine (C24)*
LC/MS Pos Late	Lipid	Fatty Acid Metabolism(Acyl Carnitine)	linolenoylcarnitine (C18:3)*
LC/MS Pos Late	Lipid	Fatty Acid Metabolism(Acyl Carnitine)	linoleoylcarnitine (C18:2)*	HMDB06469
LC/MS Pos Late	Lipid	Fatty Acid Metabolism(Acyl Carnitine)	margaroylcarnitine*	HMDB06210
LC/MS Pos Late	Lipid	Fatty Acid Metabolism(Acyl Carnitine)	myristoleoylcarnitine (C14:1)*
LC/MS Pos Late	Lipid	Fatty Acid Metabolism(Acyl Carnitine)	myristoylcarnitine (C14)	HMDB05066
LC/MS Pos Late	Lipid	Fatty Acid Metabolism(Acyl Carnitine)	nervonoylcarnitine (C24:1)*
LC/MS Pos Late	Lipid	Fatty Acid Metabolism(Acyl Carnitine)	octanoylcarnitine (C8)	HMDB00791
LC/MS Pos Late	Lipid	Fatty Acid Metabolism(Acyl Carnitine)	oleoylcarnitine (C18)	HMDB05065
LC/MS Pos Late	Lipid	Fatty Acid Metabolism(Acyl Carnitine)	palmitoleoylcarnitine (C16:1)*
LC/MS Pos Late	Lipid	Fatty Acid Metabolism(Acyl Carnitine)	palmitoylcarnitine (C16)	HMDB00222
LC/MS Pos Late	Lipid	Fatty Acid Metabolism(Acyl Carnitine)	stearoylcarnitine (C18)	HMDB00848
LC/MS Pos Late	Lipid	Fatty Acid Metabolism(Acyl Carnitine)	ximenoylcarnitine (C26:1)*
LC/MS Pos Late	Lipid	Fatty Acid, Amino	2-aminooctanoate	HMDB00991
LC/MS Pos Late	Lipid	Sphingolipid Metabolism	behenoyl dihydrosphingomyelin (d18:0/22:0)*	HMDB12091
LC/MS Pos Late	Lipid	Sphingolipid Metabolism	myristoyl dihydrosphingomyelin (d18:0/14:0)*	HMDB12085
LC/MS Pos Late	Lipid	Sphingolipid Metabolism	palmitoyl dihydrosphingomyelin (d18:0/16:0)*
LC/MS Pos Late	Lipid	Sphingolipid Metabolism	sphinganine	HMDB00269
LC/MS Pos Late	Lipid	Sphingolipid Metabolism	sphinganine-1-phosphate	HMDB01383
LC/MS Pos Late	Lipid	Sphingolipid Metabolism	sphingomyelin (d17:2/16:0, d18:2/15:0)*
LC/MS Pos Late	Lipid	Sphingolipid Metabolism	sphingomyelin (d18:0/18:0, d19:0/17:0)*	HMDB12087
LC/MS Pos Late	Lipid	Sphingolipid Metabolism	sphingomyelin (d18:0/20:0, d16:0/22:0)*
LC/MS Pos Late	Lipid	Sphingolipid Metabolism	sphingomyelin (d18:1/17:0, d17:1/18:0, d19:1/16:0)
LC/MS Pos Late	Lipid	Sphingolipid Metabolism	sphingomyelin (d18:1/19:0, d19:1/18:0)*
LC/MS Pos Late	Lipid	Sphingolipid Metabolism	sphingomyelin (d18:1/20:2, d18:2/20:1, d16:1/22:2)*
LC/MS Pos Late	Lipid	Sphingolipid Metabolism	sphingomyelin (d18:1/21:0, d17:1/22:0, d16:1/23:0)*
LC/MS Pos Late	Lipid	Sphingolipid Metabolism	sphingomyelin (d18:1/22:2, d18:2/22:1, d16:1/24:2)*
LC/MS Pos Late	Lipid	Sphingolipid Metabolism	sphingomyelin (d18:1/25:0, d19:0/24:1, d20:1/23:0, d19:1/24:0)*
LC/MS Pos Late	Lipid	Sphingolipid Metabolism	sphingomyelin (d18:2/14:0, d18:1/14:1)*
LC/MS Pos Late	Lipid	Sphingolipid Metabolism	sphingomyelin (d18:2/16:0, d18:1/16:1)*
LC/MS Pos Late	Lipid	Sphingolipid Metabolism	sphingomyelin (d18:2/18:1)*
LC/MS Pos Late	Lipid	Sphingolipid Metabolism	sphingomyelin (d18:2/21:0, d16:2/23:0)*
LC/MS Pos Late	Lipid	Sphingolipid Metabolism	sphingomyelin (d18:2/23:0, d18:1/23:1, d17:1/24:1)*
LC/MS Pos Late	Lipid	Sphingolipid Metabolism	sphingomyelin (d18:2/23:1)*
LC/MS Pos Late	Lipid	Sphingolipid Metabolism	sphingomyelin (d18:2/24:1, d18:1/24:2)*
LC/MS Pos Late	Lipid	Sphingolipid Metabolism	sphingomyelin (d18:2/24:2)*
LC/MS Pos Late	Lipid	Sphingolipid Metabolism	sphingosine	HMDB00252
LC/MS Pos Late	Lipid	Sphingolipid Metabolism	sphingosine 1-phosphate	HMDB00277
LC/MS Pos Late	Lipid	Sphingolipid Metabolism	tricosanoyl sphingomyelin (d18:1/23:0)*	HMDB12105
LC/MS Pos Late	Lipid	Sterol	campesterol	HMDB02869
LC/MS Pos Late	Lipid	Sterol	cholesterol	HMDB00067
LC/MS Pos Late	Xenobiotics	Food Component/Plant	beta-cryptoxanthin	HMDB33844
LC/MS Pos Late	Xenobiotics	Food Component/Plant	piperine	HMDB29377
