# Supplementary material for: Metabolomics and Communication Skills Development in Children; Evidence from the Ages and Stages Questionnaire
Source: Metabolites. 2019 Mar 5;9(3):42. doi: 10.3390/metabo9030042 (PMC6468693; doi:10.3390/metabo9030042)
Supplement: Supplementary file 1 [file metabolites-09-00042-s001.zip › Supplementary Table S5.xlsx]

## Sheet: Sheet1
PLATFORM	SUPER.PATHWAY	SUB.PATHWAY	BIOCHEMICAL	HMDB
LC/MS Neg	Amino Acid	Alanine and Aspartate Metabolism	N-acetylalanine	HMDB00766
LC/MS Neg	Amino Acid	Alanine and Aspartate Metabolism	N-propionylalanine
LC/MS Neg	Amino Acid	Creatine Metabolism	N-methylhydantoin	HMDB03646
LC/MS Neg	Amino Acid	Glutamate Metabolism	N-acetyl-aspartyl-glutamate (NAAG)	HMDB01067
LC/MS Neg	Amino Acid	Glutathione Metabolism	5-oxoproline	HMDB00267
LC/MS Neg	Amino Acid	Glycine, Serine and Threonine Metabolism	N-acetylthreonine
LC/MS Neg	Amino Acid	Histidine Metabolism	carnosine	HMDB00033
LC/MS Neg	Amino Acid	Histidine Metabolism	histidine	HMDB00177
LC/MS Neg	Amino Acid	Leucine, Isoleucine and Valine Metabolism	2-hydroxy-3-methylvalerate	HMDB00317
LC/MS Neg	Amino Acid	Leucine, Isoleucine and Valine Metabolism	2-methylbutyrylglycine	HMDB00339
LC/MS Neg	Amino Acid	Leucine, Isoleucine and Valine Metabolism	3-hydroxy-2-ethylpropionate	HMDB00396
LC/MS Neg	Amino Acid	Leucine, Isoleucine and Valine Metabolism	3-methyl-2-oxovalerate	HMDB03736
LC/MS Neg	Amino Acid	Leucine, Isoleucine and Valine Metabolism	4-methyl-2-oxopentanoate	HMDB00695
LC/MS Neg	Amino Acid	Leucine, Isoleucine and Valine Metabolism	alpha-hydroxyisocaproate	HMDB00746
LC/MS Neg	Amino Acid	Leucine, Isoleucine and Valine Metabolism	beta-hydroxyisovalerate	HMDB00754
LC/MS Neg	Amino Acid	Leucine, Isoleucine and Valine Metabolism	isobutyrylglycine	HMDB00730
LC/MS Neg	Amino Acid	Leucine, Isoleucine and Valine Metabolism	isovalerate	HMDB00718
LC/MS Neg	Amino Acid	Leucine, Isoleucine and Valine Metabolism	isovalerylglycine	HMDB00678
LC/MS Neg	Amino Acid	Leucine, Isoleucine and Valine Metabolism	isovaleryltryptophan
LC/MS Neg	Amino Acid	Leucine, Isoleucine and Valine Metabolism	N-acetylisoleucine	HMDB61684
LC/MS Neg	Amino Acid	Leucine, Isoleucine and Valine Metabolism	N-acetylleucine	HMDB11756
LC/MS Neg	Amino Acid	Leucine, Isoleucine and Valine Metabolism	N-acetylvaline	HMDB11757
LC/MS Neg	Amino Acid	Methionine, Cysteine, SAM and Taurine Metabolism	4-methylthio-2-oxobutanoate	HMDB01553
LC/MS Neg	Amino Acid	Methionine, Cysteine, SAM and Taurine Metabolism	cysteine s-sulfate	HMDB00731
LC/MS Neg	Amino Acid	Methionine, Cysteine, SAM and Taurine Metabolism	N-acetylmethionine	HMDB11745
LC/MS Neg	Amino Acid	Methionine, Cysteine, SAM and Taurine Metabolism	N-acetyltaurine
LC/MS Neg	Amino Acid	Methionine, Cysteine, SAM and Taurine Metabolism	N-formylmethionine	HMDB01015
LC/MS Neg	Amino Acid	Phenylalanine Metabolism	4-hydroxyphenylacetate	HMDB00020
LC/MS Neg	Amino Acid	Phenylalanine Metabolism	N-acetylphenylalanine	HMDB00512
LC/MS Neg	Amino Acid	Phenylalanine Metabolism	phenylacetate	HMDB00209
LC/MS Neg	Amino Acid	Phenylalanine Metabolism	phenyllactate (PLA)	HMDB00779
LC/MS Neg	Amino Acid	Phenylalanine Metabolism	phenylpyruvate	HMDB00205
LC/MS Neg	Amino Acid	Phenylalanine Metabolism	valerylphenylalanine
LC/MS Neg	Amino Acid	Tryptophan Metabolism	indole	HMDB00738
LC/MS Neg	Amino Acid	Tryptophan Metabolism	indole-3-carboxylic acid	HMDB03320
LC/MS Neg	Amino Acid	Tryptophan Metabolism	indoleacetate	HMDB00197
LC/MS Neg	Amino Acid	Tryptophan Metabolism	indolelactate	HMDB00671
LC/MS Neg	Amino Acid	Tryptophan Metabolism	kynurenate	HMDB00715
LC/MS Neg	Amino Acid	Tryptophan Metabolism	N-acetyltryptophan	HMDB13713
LC/MS Neg	Amino Acid	Tryptophan Metabolism	N-formylanthranilic acid	HMDB04089
LC/MS Neg	Amino Acid	Tryptophan Metabolism	tryptophan betaine	HMDB61115
LC/MS Neg	Amino Acid	Tyrosine Metabolism	3-(4-hydroxyphenyl)lactate	HMDB00755
LC/MS Neg	Amino Acid	Tyrosine Metabolism	3,4-dihydroxyphenylacetate	HMDB01336
LC/MS Neg	Amino Acid	Tyrosine Metabolism	4-hydroxyphenylpyruvate	HMDB00707
LC/MS Neg	Amino Acid	Tyrosine Metabolism	cis-4-hydroxycyclohexylacetic acid	HMDB00451
LC/MS Neg	Amino Acid	Tyrosine Metabolism	gentisate	HMDB00152
LC/MS Neg	Amino Acid	Tyrosine Metabolism	homovanillate sulfate	HMDB11719
LC/MS Neg	Amino Acid	Tyrosine Metabolism	N-acetyltyrosine	HMDB00866
LC/MS Neg	Amino Acid	Tyrosine Metabolism	N-formylphenylalanine
LC/MS Neg	Amino Acid	Tyrosine Metabolism	phenol sulfate	HMDB60015
LC/MS Neg	Amino Acid	Tyrosine Metabolism	tyramine O-sulfate	HMDB06409
LC/MS Neg	Amino Acid	Tyrosine Metabolism	vanillactate	HMDB00913
LC/MS Neg	Amino Acid	Urea cycle; Arginine and Proline Metabolism	N-acetylcitrulline	HMDB00856
LC/MS Neg	Carbohydrate	Aminosugar Metabolism	N-acetyl-beta-glucosaminylamine	HMDB01104
LC/MS Neg	Carbohydrate	Aminosugar Metabolism	N-acetylmuramate	HMDB60493
LC/MS Neg	Carbohydrate	Disaccharides and Oligosaccharides	lactobionate
LC/MS Neg	Carbohydrate	Disaccharides and Oligosaccharides	maltitol/lactitol/cellobiotol/palatinol
LC/MS Neg	Carbohydrate	Disaccharides and Oligosaccharides	sucrose	HMDB00258
LC/MS Neg	Carbohydrate	Glycogen Metabolism	maltotetraose	HMDB01296
LC/MS Neg	Carbohydrate	Glycogen Metabolism	maltotriose	HMDB01262
LC/MS Neg	Carbohydrate	Glycolysis, Gluconeogenesis, and Pyruvate Metabolism	pyruvate	HMDB00243
LC/MS Neg	Cofactors and Vitamins	Ascorbate and Aldarate Metabolism	oxalate (ethanedioate)	HMDB02329
LC/MS Neg	Cofactors and Vitamins	Hemoglobin and Porphyrin Metabolism	I-urobilinogen	HMDB04157
LC/MS Neg	Cofactors and Vitamins	Hemoglobin and Porphyrin Metabolism	L-urobilin	HMDB04159
LC/MS Neg	Cofactors and Vitamins	Nicotinate and Nicotinamide Metabolism	quinolinate	HMDB00232
LC/MS Neg	Cofactors and Vitamins	Pterin Metabolism	pterin	HMDB00802
LC/MS Neg	Cofactors and Vitamins	Riboflavin Metabolism	flavin adenine dinucleotide (FAD)	HMDB01248
LC/MS Neg	Cofactors and Vitamins	Riboflavin Metabolism	flavin mononucleotide (FMN)	HMDB01520
LC/MS Neg	Cofactors and Vitamins	Tocopherol Metabolism	alpha-CEHC	HMDB01518
LC/MS Neg	Cofactors and Vitamins	Tocopherol Metabolism	alpha-CEHC sulfate
LC/MS Neg	Cofactors and Vitamins	Tocopherol Metabolism	gamma-CEHC	HMDB01931
LC/MS Neg	Cofactors and Vitamins	Vitamin B6 Metabolism	pyridoxate	HMDB00017
LC/MS Neg	Energy	Oxidative Phosphorylation	phosphate	HMDB01429
LC/MS Neg	Energy	TCA Cycle	2-methylcitrate/homocitrate
LC/MS Neg	Energy	TCA Cycle	aconitate [cis or trans]
LC/MS Neg	Energy	TCA Cycle	malate	HMDB00156
LC/MS Neg	Energy	TCA Cycle	tricarballylate	HMDB31193
LC/MS Neg	Lipid	Androgenic Steroids	11-ketoetiocholanolone sulfate
LC/MS Neg	Lipid	Androgenic Steroids	androstenediol (3beta,17beta) disulfate (1)	HMDB03818
LC/MS Neg	Lipid	Androgenic Steroids	androstenediol (3beta,17beta) disulfate (2)	HMDB03818
LC/MS Neg	Lipid	Androgenic Steroids	androstenediol (3beta,17beta) monosulfate (1)	HMDB03818
LC/MS Neg	Lipid	Androgenic Steroids	androsterone sulfate	HMDB02759
LC/MS Neg	Lipid	Androgenic Steroids	dehydroisoandrosterone sulfate (DHEA-S)	HMDB01032
LC/MS Neg	Lipid	Corticosteroids	cortolone	HMDB03128
LC/MS Neg	Lipid	Corticosteroids	tetrahydrocortisol	HMDB00949
LC/MS Neg	Lipid	Endocannabinoid	linoleoyl ethanolamide	HMDB12252
LC/MS Neg	Lipid	Endocannabinoid	N-palmitoylserine
LC/MS Neg	Lipid	Endocannabinoid	palmitoyl ethanolamide	HMDB02100
LC/MS Neg	Lipid	Fatty Acid Metabolism (also BCAA Metabolism)	butyrylglycine	HMDB00808
LC/MS Neg	Lipid	Fatty Acid Metabolism (also BCAA Metabolism)	propionylglycine	HMDB00783
LC/MS Neg	Lipid	Fatty Acid Metabolism(Acyl Glycine)	N-palmitoylglycine	HMDB13034
LC/MS Neg	Lipid	Fatty Acid Metabolism(Acyl Glycine)	valerylglycine	HMDB00927
LC/MS Neg	Lipid	Fatty Acid Synthesis	malonate	HMDB00691
LC/MS Neg	Lipid	Fatty Acid, Branched	13-methylmyristate
LC/MS Neg	Lipid	Fatty Acid, Branched	15-methylpalmitate
LC/MS Neg	Lipid	Fatty Acid, Branched	17-methylstearate	HMDB37397
LC/MS Neg	Lipid	Fatty Acid, Branched	isocaproate	HMDB00689
LC/MS Neg	Lipid	Fatty Acid, Branched	pristanate	HMDB00795
LC/MS Neg	Lipid	Fatty Acid, Dicarboxylate	3-carboxyadipate
LC/MS Neg	Lipid	Fatty Acid, Dicarboxylate	dodecanedioate	HMDB00623
LC/MS Neg	Lipid	Fatty Acid, Dicarboxylate	hexadecanedioate	HMDB00672
LC/MS Neg	Lipid	Fatty Acid, Dicarboxylate	octadecenedioate (C18:1-DC)
LC/MS Neg	Lipid	Fatty Acid, Dicarboxylate	sebacate (decanedioate)	HMDB00792
LC/MS Neg	Lipid	Fatty Acid, Dicarboxylate	undecanedioate	HMDB00888
LC/MS Neg	Lipid	Fatty Acid, Dihydroxy	12,13-DiHOME	HMDB04705
LC/MS Neg	Lipid	Fatty Acid, Dihydroxy	9,10-DiHOME	HMDB04704
LC/MS Neg	Lipid	Fatty Acid, Monohydroxy	10-hydroxystearate	HMDB37396
LC/MS Neg	Lipid	Fatty Acid, Monohydroxy	13-HODE + 9-HODE
LC/MS Neg	Lipid	Fatty Acid, Monohydroxy	2-hydroxybehenate
LC/MS Neg	Lipid	Fatty Acid, Monohydroxy	2-hydroxydecanoate
LC/MS Neg	Lipid	Fatty Acid, Monohydroxy	2-hydroxymyristate	HMDB02261
LC/MS Neg	Lipid	Fatty Acid, Monohydroxy	2-hydroxypalmitate	HMDB31057
LC/MS Neg	Lipid	Fatty Acid, Monohydroxy	2-hydroxystearate
LC/MS Neg	Lipid	Fatty Acid, Monohydroxy	3-hydroxydecanoate	HMDB02203
LC/MS Neg	Lipid	Fatty Acid, Monohydroxy	3-hydroxyhexanoate
LC/MS Neg	Lipid	Fatty Acid, Monohydroxy	3-hydroxylaurate	HMDB00387
LC/MS Neg	Lipid	Fatty Acid, Monohydroxy	3-hydroxymyristate
LC/MS Neg	Lipid	Fatty Acid, Monohydroxy	3-hydroxyoctanoate	HMDB01954
LC/MS Neg	Lipid	Fatty Acid, Monohydroxy	3-hydroxystearate
LC/MS Neg	Lipid	Fatty Acid, Monohydroxy	3-hydroxysuberate	HMDB00325
LC/MS Neg	Lipid	Fatty Acid, Monohydroxy	5-hydroxyhexanoate	HMDB00525
LC/MS Neg	Lipid	Glycerolipid Metabolism	glycerol	HMDB00131
LC/MS Neg	Lipid	Long Chain Fatty Acid	arachidate (20:0)	HMDB02212
LC/MS Neg	Lipid	Long Chain Fatty Acid	eicosenoate (20:1)	HMDB02231
LC/MS Neg	Lipid	Long Chain Fatty Acid	erucate (22:1n9)	HMDB02068
LC/MS Neg	Lipid	Long Chain Fatty Acid	margarate (17:0)	HMDB02259
LC/MS Neg	Lipid	Long Chain Fatty Acid	myristate (14:0)	HMDB00806
LC/MS Neg	Lipid	Long Chain Fatty Acid	myristoleate (14:1n5)	HMDB02000
LC/MS Neg	Lipid	Long Chain Fatty Acid	nonadecanoate (19:0)	HMDB00772
LC/MS Neg	Lipid	Long Chain Fatty Acid	oleate/vaccenate (18:1)
LC/MS Neg	Lipid	Long Chain Fatty Acid	palmitate (16:0)	HMDB00220
LC/MS Neg	Lipid	Long Chain Fatty Acid	palmitoleate (16:1n7)	HMDB03229
LC/MS Neg	Lipid	Long Chain Fatty Acid	pentadecanoate (15:0)	HMDB00826
LC/MS Neg	Lipid	Long Chain Fatty Acid	stearate (18:0)	HMDB00827
LC/MS Neg	Lipid	Long Chain Fatty Acid	trans-nonadecenoate (tr 19:1)*
LC/MS Neg	Lipid	Lysophospholipid	1-oleoyl-GPE (18:1)	HMDB11506
LC/MS Neg	Lipid	Lysophospholipid	1-palmitoyl-GPE (16:0)	HMDB11503
LC/MS Neg	Lipid	Lysophospholipid	1-palmitoyl-GPG (16:0)*
LC/MS Neg	Lipid	Lysophospholipid	1-palmitoyl-GPI (16:0)	HMDB61695
LC/MS Neg	Lipid	Lysophospholipid	1-stearoyl-GPE (18:0)	HMDB11130
LC/MS Neg	Lipid	Lysophospholipid	1-stearoyl-GPG (18:0)
LC/MS Neg	Lipid	Lysophospholipid	1-stearoyl-GPI (18:0)	HMDB61696
LC/MS Neg	Lipid	Lysophospholipid	1-stearoyl-GPS (18:0)*
LC/MS Neg	Lipid	Lysoplasmalogen	1-(1-enyl-palmitoyl)-GPE (P-16:0)*
LC/MS Neg	Lipid	Lysoplasmalogen	1-(1-enyl-stearoyl)-GPE (P-18:0)*
LC/MS Neg	Lipid	Medium Chain Fatty Acid	10-undecenoate (11:1n1)	HMDB33724
LC/MS Neg	Lipid	Medium Chain Fatty Acid	5-dodecenoate (12:1n7)	HMDB00529
LC/MS Neg	Lipid	Medium Chain Fatty Acid	caprate (10:0)	HMDB00511
LC/MS Neg	Lipid	Medium Chain Fatty Acid	caproate (6:0)	HMDB00535
LC/MS Neg	Lipid	Medium Chain Fatty Acid	caprylate (8:0)	HMDB00482
LC/MS Neg	Lipid	Medium Chain Fatty Acid	heptanoate (7:0)	HMDB00666
LC/MS Neg	Lipid	Medium Chain Fatty Acid	laurate (12:0)	HMDB00638
LC/MS Neg	Lipid	Medium Chain Fatty Acid	undecanoate (11:0)	HMDB00947
LC/MS Neg	Lipid	Mevalonate Metabolism	R-mevalonate 5-diphosphate	HMDB01981
LC/MS Neg	Lipid	Monoacylglycerol	1-linolenoylglycerol (18:3)	HMDB11569
LC/MS Neg	Lipid	Monoacylglycerol	1-linoleoylglycerol (18:2)
LC/MS Neg	Lipid	Monoacylglycerol	1-margaroylglycerol (17:0)
LC/MS Neg	Lipid	Monoacylglycerol	1-myristoylglycerol (14:0)	HMDB11561
LC/MS Neg	Lipid	Monoacylglycerol	1-oleoylglycerol (18:1)	HMDB11567
LC/MS Neg	Lipid	Monoacylglycerol	1-palmitoleoylglycerol (16:1)*	HMDB11565
LC/MS Neg	Lipid	Monoacylglycerol	1-palmitoylglycerol (16:0)	HMDB31074
LC/MS Neg	Lipid	Monoacylglycerol	1-pentadecanoylglycerol (15:0)
LC/MS Neg	Lipid	Monoacylglycerol	2-linoleoylglycerol (18:2)	HMDB11538
LC/MS Neg	Lipid	Monoacylglycerol	2-oleoylglycerol (18:1)	HMDB11537
LC/MS Neg	Lipid	Monoacylglycerol	2-palmitoylglycerol (16:0)	HMDB11533
LC/MS Neg	Lipid	Polyunsaturated Fatty Acid (n3 and n6)	adrenate (22:4n6)	HMDB02226
LC/MS Neg	Lipid	Polyunsaturated Fatty Acid (n3 and n6)	arachidonate (20:4n6)	HMDB01043
LC/MS Neg	Lipid	Polyunsaturated Fatty Acid (n3 and n6)	dihomo-linoleate (20:2n6)	HMDB05060
LC/MS Neg	Lipid	Polyunsaturated Fatty Acid (n3 and n6)	dihomo-linolenate (20:3n3 or n6)	HMDB02925
LC/MS Neg	Lipid	Polyunsaturated Fatty Acid (n3 and n6)	docosadienoate (22:2n6)	HMDB61714
LC/MS Neg	Lipid	Polyunsaturated Fatty Acid (n3 and n6)	docosahexaenoate (DHA; 22:6n3)	HMDB02183
LC/MS Neg	Lipid	Polyunsaturated Fatty Acid (n3 and n6)	docosapentaenoate (n3 DPA; 22:5n3)	HMDB06528
LC/MS Neg	Lipid	Polyunsaturated Fatty Acid (n3 and n6)	docosapentaenoate (n6 DPA; 22:5n6)	HMDB01976
LC/MS Neg	Lipid	Polyunsaturated Fatty Acid (n3 and n6)	eicosapentaenoate (EPA; 20:5n3)	HMDB01999
LC/MS Neg	Lipid	Polyunsaturated Fatty Acid (n3 and n6)	hexadecadienoate (16:2n6)	HMDB00477
LC/MS Neg	Lipid	Polyunsaturated Fatty Acid (n3 and n6)	linoleate (18:2n6)	HMDB00673
LC/MS Neg	Lipid	Polyunsaturated Fatty Acid (n3 and n6)	linolenate [alpha or gamma; (18:3n3 or 6)]	HMDB03073
LC/MS Neg	Lipid	Polyunsaturated Fatty Acid (n3 and n6)	mead acid (20:3n9)	HMDB10378
LC/MS Neg	Lipid	Pregnenolone Steroids	17alpha-hydroxypregnenolone 3-sulfate	HMDB00416
LC/MS Neg	Lipid	Pregnenolone Steroids	21-hydroxypregnenolone monosulfate (1)
LC/MS Neg	Lipid	Pregnenolone Steroids	pregnenolone sulfate	HMDB00774
LC/MS Neg	Lipid	Primary Bile Acid Metabolism	chenodeoxycholate	HMDB00518
LC/MS Neg	Lipid	Primary Bile Acid Metabolism	cholate	HMDB00619
LC/MS Neg	Lipid	Primary Bile Acid Metabolism	cholate sulfate
LC/MS Neg	Lipid	Primary Bile Acid Metabolism	glycochenodeoxycholate	HMDB00637
LC/MS Neg	Lipid	Primary Bile Acid Metabolism	glycocholate	HMDB00138
LC/MS Neg	Lipid	Primary Bile Acid Metabolism	taurochenodeoxycholate	HMDB00951
LC/MS Neg	Lipid	Primary Bile Acid Metabolism	taurocholate	HMDB00036
LC/MS Neg	Lipid	Progestin Steroids	5alpha-pregnan-3beta,20alpha-diol disulfate
LC/MS Neg	Lipid	Progestin Steroids	5alpha-pregnan-3beta,20alpha-diol monosulfate (1)
LC/MS Neg	Lipid	Progestin Steroids	5alpha-pregnan-3beta,20beta-diol monosulfate (1)
LC/MS Neg	Lipid	Progestin Steroids	pregn steroid monosulfate*
LC/MS Neg	Lipid	Progestin Steroids	pregnanolone/allopregnanolone sulfate
LC/MS Neg	Lipid	Progestin Steroids	pregnen-diol disulfate*
LC/MS Neg	Lipid	Secondary Bile Acid Metabolism	12-dehydrocholate	HMDB00400
LC/MS Neg	Lipid	Secondary Bile Acid Metabolism	3-dehydrocholate	HMDB00502
LC/MS Neg	Lipid	Secondary Bile Acid Metabolism	3b-hydroxy-5-cholenoic acid	HMDB00308
LC/MS Neg	Lipid	Secondary Bile Acid Metabolism	6-oxolithocholate
LC/MS Neg	Lipid	Secondary Bile Acid Metabolism	7-ketodeoxycholate	HMDB00391
LC/MS Neg	Lipid	Secondary Bile Acid Metabolism	7-ketolithocholate	HMDB00467
LC/MS Neg	Lipid	Secondary Bile Acid Metabolism	7,12-diketolithocholate
LC/MS Neg	Lipid	Secondary Bile Acid Metabolism	dehydrolithocholate	HMDB00502
LC/MS Neg	Lipid	Secondary Bile Acid Metabolism	deoxycholate	HMDB00626
LC/MS Neg	Lipid	Secondary Bile Acid Metabolism	glycocholenate sulfate*
LC/MS Neg	Lipid	Secondary Bile Acid Metabolism	glycodeoxycholate	HMDB00631
LC/MS Neg	Lipid	Secondary Bile Acid Metabolism	glycolithocholate sulfate*	HMDB02639
LC/MS Neg	Lipid	Secondary Bile Acid Metabolism	glycoursodeoxycholate	HMDB00708
LC/MS Neg	Lipid	Secondary Bile Acid Metabolism	hyocholate	HMDB00760
LC/MS Neg	Lipid	Secondary Bile Acid Metabolism	isoursodeoxycholate	HMDB00686
LC/MS Neg	Lipid	Secondary Bile Acid Metabolism	lithocholate	HMDB00761
LC/MS Neg	Lipid	Secondary Bile Acid Metabolism	taurocholenate sulfate
LC/MS Neg	Lipid	Secondary Bile Acid Metabolism	tauroursodeoxycholate	HMDB00874
LC/MS Neg	Lipid	Secondary Bile Acid Metabolism	ursocholate
LC/MS Neg	Lipid	Secondary Bile Acid Metabolism	ursodeoxycholate	HMDB00946
LC/MS Neg	Lipid	Secondary Bile Acid Metabolism	ursodeoxycholate sulfate (1)
LC/MS Neg	Lipid	Short Chain Fatty Acid	valerate	HMDB00892
LC/MS Neg	Lipid	Sphingolipid Metabolism	N-acetylsphingosine	HMDB04950
LC/MS Neg	Lipid	Sphingolipid Metabolism	N-butyroyl-sphingosine (d18:1/4:0)
LC/MS Neg	Nucleotide	Purine Metabolism, (Hypo)Xanthine/Inosine containing	hypoxanthine	HMDB00157
LC/MS Neg	Nucleotide	Purine Metabolism, (Hypo)Xanthine/Inosine containing	inosine	HMDB00195
LC/MS Neg	Nucleotide	Purine Metabolism, (Hypo)Xanthine/Inosine containing	urate	HMDB00289
LC/MS Neg	Nucleotide	Purine Metabolism, (Hypo)Xanthine/Inosine containing	xanthosine	HMDB00299
LC/MS Neg	Nucleotide	Purine Metabolism, Adenine containing	N6-carbamoylthreonyladenosine	HMDB41623
LC/MS Neg	Nucleotide	Purine Metabolism, Guanine containing	2'-deoxyguanosine	HMDB00085
LC/MS Neg	Nucleotide	Pyrimidine Metabolism, Thymine containing	thymidine	HMDB00273
LC/MS Neg	Nucleotide	Pyrimidine Metabolism, Thymine containing	thymine	HMDB00262
LC/MS Neg	Nucleotide	Pyrimidine Metabolism, Uracil containing	2'-deoxyuridine	HMDB00012
LC/MS Neg	Nucleotide	Pyrimidine Metabolism, Uracil containing	2'-O-methyluridine
LC/MS Neg	Nucleotide	Pyrimidine Metabolism, Uracil containing	5-methyluridine (ribothymidine)	HMDB00884
LC/MS Neg	Nucleotide	Pyrimidine Metabolism, Uracil containing	N-acetyl-beta-alanine
LC/MS Neg	Nucleotide	Pyrimidine Metabolism, Uracil containing	pseudouridine	HMDB00767
LC/MS Neg	Nucleotide	Pyrimidine Metabolism, Uracil containing	uracil	HMDB00300
LC/MS Neg	Nucleotide	Pyrimidine Metabolism, Uracil containing	uridine	HMDB00296
LC/MS Neg	Nucleotide	Pyrimidine Metabolism, Uracil containing	uridine-2',3'-cyclic monophosphate	HMDB11640
LC/MS Neg	Peptide	Acetylated Peptides	phenylacetylglutamine	HMDB06344
LC/MS Neg	Peptide	Acetylated Peptides	phenylacetylglycine	HMDB00821
LC/MS Neg	Peptide	Acetylated Peptides	phenylacetylphenylalanine
LC/MS Neg	Peptide	Dipeptide	histidylalanine	HMDB28878
LC/MS Neg	Peptide	Dipeptide	isoleucylglycine	HMDB28907
LC/MS Neg	Peptide	Dipeptide	phenylalanylalanine
LC/MS Neg	Peptide	Dipeptide	phenylalanylglycine	HMDB28995
LC/MS Neg	Peptide	Dipeptide	pyr-leu*
LC/MS Neg	Peptide	Dipeptide	threonylphenylalanine	HMDB29068
LC/MS Neg	Peptide	Dipeptide	tryptophylglycine	HMDB29083
LC/MS Neg	Peptide	Dipeptide	valylglycine	HMDB29127
LC/MS Neg	Peptide	Gamma-glutamyl Amino Acid	gamma-glutamylglutamate	HMDB11737
LC/MS Neg	Peptide	Gamma-glutamyl Amino Acid	gamma-glutamylisoleucine*	HMDB11170
LC/MS Neg	Peptide	Gamma-glutamyl Amino Acid	gamma-glutamylleucine	HMDB11171
LC/MS Neg	Peptide	Gamma-glutamyl Amino Acid	gamma-glutamylphenylalanine	HMDB00594
LC/MS Neg	Xenobiotics	Bacterial/Fungal	3-deoxyoctulosonate
LC/MS Neg	Xenobiotics	Benzoate Metabolism	2-(4-hydroxyphenyl)propionate	HMDB41683
LC/MS Neg	Xenobiotics	Benzoate Metabolism	2-methylbutyrylphenylalanine
LC/MS Neg	Xenobiotics	Benzoate Metabolism	2,4,6-trihydroxybenzoate	HMDB29649
LC/MS Neg	Xenobiotics	Benzoate Metabolism	3-(2-hydroxyphenyl)propionate	HMDB33752
LC/MS Neg	Xenobiotics	Benzoate Metabolism	3-(3-hydroxyphenyl)propionate	HMDB00375
LC/MS Neg	Xenobiotics	Benzoate Metabolism	3-(3-hydroxyphenyl)propionate sulfate
LC/MS Neg	Xenobiotics	Benzoate Metabolism	3-(4-hydroxyphenyl)propionate	HMDB02199
LC/MS Neg	Xenobiotics	Benzoate Metabolism	3-phenylpropionate (hydrocinnamate)	HMDB00764
LC/MS Neg	Xenobiotics	Benzoate Metabolism	4-hydroxybenzoate	HMDB00500
LC/MS Neg	Xenobiotics	Benzoate Metabolism	4-methylcatechol sulfate
LC/MS Neg	Xenobiotics	Benzoate Metabolism	benzoate	HMDB01870
LC/MS Neg	Xenobiotics	Benzoate Metabolism	catechol sulfate	HMDB59724
LC/MS Neg	Xenobiotics	Benzoate Metabolism	hippurate	HMDB00714
LC/MS Neg	Xenobiotics	Benzoate Metabolism	p-cresol	HMDB01858
LC/MS Neg	Xenobiotics	Benzoate Metabolism	p-cresol sulfate	HMDB11635
LC/MS Neg	Xenobiotics	Benzoate Metabolism	p-hydroxybenzaldehyde	HMDB11718
LC/MS Neg	Xenobiotics	Benzoate Metabolism	phenylpropionylglycine	HMDB00860
LC/MS Neg	Xenobiotics	Chemical	2-aminophenol sulfate	HMDB61116
LC/MS Neg	Xenobiotics	Chemical	2,4-dihydroxyhydrocinnamate
LC/MS Neg	Xenobiotics	Chemical	4-acetamidobenzoate
LC/MS Neg	Xenobiotics	Chemical	brilliant blue FCF (blue 1)
LC/MS Neg	Xenobiotics	Chemical	N-propionylmethionine
LC/MS Neg	Xenobiotics	Chemical	O-sulfo-L-tyrosine
LC/MS Neg	Xenobiotics	Chemical	sulfate*	HMDB01448
LC/MS Neg	Xenobiotics	Food Component/Plant	1-methyl-beta-carboline-3-carboxylic acid
LC/MS Neg	Xenobiotics	Food Component/Plant	2-oxindole-3-acetate	HMDB35514
LC/MS Neg	Xenobiotics	Food Component/Plant	3-hydroxycinnamate	HMDB01713
LC/MS Neg	Xenobiotics	Food Component/Plant	3,5-dihydroxybenzoic acid	HMDB13677
LC/MS Neg	Xenobiotics	Food Component/Plant	4-hydroxycinnamate	HMDB02035
LC/MS Neg	Xenobiotics	Food Component/Plant	apigenin	HMDB02124
LC/MS Neg	Xenobiotics	Food Component/Plant	caffeate	HMDB01964
LC/MS Neg	Xenobiotics	Food Component/Plant	daidzein	HMDB03312
LC/MS Neg	Xenobiotics	Food Component/Plant	digalacturonic acid	HMDB39721
LC/MS Neg	Xenobiotics	Food Component/Plant	dihydroferulic acid
LC/MS Neg	Xenobiotics	Food Component/Plant	enterodiol
LC/MS Neg	Xenobiotics	Food Component/Plant	enterolactone
LC/MS Neg	Xenobiotics	Food Component/Plant	epicatechin	HMDB01871
LC/MS Neg	Xenobiotics	Food Component/Plant	erythrose	HMDB02649
LC/MS Neg	Xenobiotics	Food Component/Plant	ferulate	HMDB00954
LC/MS Neg	Xenobiotics	Food Component/Plant	fucitol
LC/MS Neg	Xenobiotics	Food Component/Plant	furaneol sulfate
LC/MS Neg	Xenobiotics	Food Component/Plant	genistein	HMDB03217
LC/MS Neg	Xenobiotics	Food Component/Plant	hesperetin	HMDB05782
LC/MS Neg	Xenobiotics	Food Component/Plant	N-acetylpyrraline
LC/MS Neg	Xenobiotics	Food Component/Plant	naringenin	HMDB02670
LC/MS Neg	Xenobiotics	Food Component/Plant	oleanolate	HMDB02364
LC/MS Neg	Xenobiotics	Food Component/Plant	phytanate	HMDB00801
LC/MS Neg	Xenobiotics	Food Component/Plant	ponciretin
LC/MS Neg	Xenobiotics	Food Component/Plant	pyrraline	HMDB33143
LC/MS Neg	Xenobiotics	Food Component/Plant	saccharin	HMDB29723
LC/MS Neg	Xenobiotics	Food Component/Plant	sinapate	HMDB32616
LC/MS Neg	Xenobiotics	Food Component/Plant	steviol
LC/MS Neg	Xenobiotics	Food Component/Plant	sucralose	HMDB31554
LC/MS Neg	Xenobiotics	Food Component/Plant	syringic acid	HMDB02085
LC/MS Neg	Xenobiotics	Food Component/Plant	tartarate	HMDB00956
LC/MS Neg	Xenobiotics	Food Component/Plant	tyrosol	HMDB04284
LC/MS Neg	Xenobiotics	Food Component/Plant	vanillate	HMDB00484
LC/MS Neg	Xenobiotics	Xanthine Metabolism	1-methylxanthine	HMDB10738
LC/MS Neg	Xenobiotics	Xanthine Metabolism	1,3-dimethylurate	HMDB01857
LC/MS Neg	Xenobiotics	Xanthine Metabolism	1,3,7-trimethylurate	HMDB02123
LC/MS Neg	Xenobiotics	Xanthine Metabolism	1,7-dimethylurate	HMDB11103
LC/MS Neg	Xenobiotics	Xanthine Metabolism	3-methylurate*
LC/MS Neg	Xenobiotics	Xanthine Metabolism	3-methylxanthine	HMDB01886
LC/MS Neg	Xenobiotics	Xanthine Metabolism	3,7-dimethylurate	HMDB01982
LC/MS Polar	Amino Acid	Alanine and Aspartate Metabolism	N-acetylaspartate (NAA)	HMDB00812
LC/MS Polar	Amino Acid	Glutathione Metabolism	2-hydroxybutyrate/2-hydroxyisobutyrate
LC/MS Polar	Amino Acid	Glycine, Serine and Threonine Metabolism	allo-threonine	HMDB04041
LC/MS Polar	Amino Acid	Glycine, Serine and Threonine Metabolism	O-acetylhomoserine
LC/MS Polar	Amino Acid	Histidine Metabolism	cis-urocanate	HMDB34174
LC/MS Polar	Amino Acid	Leucine, Isoleucine and Valine Metabolism	2,3-dihydroxy-2-methylbutyrate	HMDB29576
LC/MS Polar	Amino Acid	Leucine, Isoleucine and Valine Metabolism	2,3-dimethylsuccinate
LC/MS Polar	Amino Acid	Leucine, Isoleucine and Valine Metabolism	3-hydroxyisobutyrate	HMDB00336
LC/MS Polar	Amino Acid	Leucine, Isoleucine and Valine Metabolism	3-methyl-2-oxobutyrate	HMDB00019
LC/MS Polar	Amino Acid	Leucine, Isoleucine and Valine Metabolism	3-methylglutaconate	HMDB00522
LC/MS Polar	Amino Acid	Leucine, Isoleucine and Valine Metabolism	alpha-hydroxyisovalerate	HMDB00407
LC/MS Polar	Amino Acid	Leucine, Isoleucine and Valine Metabolism	ethylmalonate	HMDB00622
LC/MS Polar	Amino Acid	Leucine, Isoleucine and Valine Metabolism	methylsuccinate	HMDB01844
LC/MS Polar	Amino Acid	Lysine Metabolism	N2-acetyllysine	HMDB00446
LC/MS Polar	Amino Acid	Lysine Metabolism	N6-acetyllysine	HMDB00206
LC/MS Polar	Amino Acid	Lysine Metabolism	N6-carboxyethyllysine
LC/MS Polar	Amino Acid	Methionine, Cysteine, SAM and Taurine Metabolism	alpha-ketobutyrate	HMDB00005
LC/MS Polar	Amino Acid	Phenylalanine Metabolism	3-hydroxyphenylacetate	HMDB00440
LC/MS Polar	Amino Acid	Tyrosine Metabolism	2-hydroxyphenylacetate	HMDB00669
LC/MS Polar	Carbohydrate	Aminosugar Metabolism	erythronate*	HMDB00613
LC/MS Polar	Carbohydrate	Aminosugar Metabolism	glucuronate	HMDB00127
LC/MS Polar	Carbohydrate	Fructose, Mannose and Galactose Metabolism	fructose	HMDB00660
LC/MS Polar	Carbohydrate	Fructose, Mannose and Galactose Metabolism	galactonate	HMDB00565
LC/MS Polar	Carbohydrate	Fructose, Mannose and Galactose Metabolism	mannitol/sorbitol	HMDB00247
LC/MS Polar	Carbohydrate	Fructose, Mannose and Galactose Metabolism	mannose	HMDB00169
LC/MS Polar	Carbohydrate	Glycogen Metabolism	maltose	HMDB00163
LC/MS Polar	Carbohydrate	Glycolysis, Gluconeogenesis, and Pyruvate Metabolism	glucose	HMDB00122
LC/MS Polar	Carbohydrate	Glycolysis, Gluconeogenesis, and Pyruvate Metabolism	glycerate	HMDB00139
LC/MS Polar	Carbohydrate	Glycolysis, Gluconeogenesis, and Pyruvate Metabolism	lactate	HMDB00190
LC/MS Polar	Carbohydrate	Pentose Metabolism	arabinose	HMDB00646
LC/MS Polar	Carbohydrate	Pentose Metabolism	arabitol/xylitol
LC/MS Polar	Carbohydrate	Pentose Metabolism	arabonate/xylonate
LC/MS Polar	Carbohydrate	Pentose Metabolism	ribitol	HMDB00508
LC/MS Polar	Carbohydrate	Pentose Metabolism	ribonate	HMDB00867
LC/MS Polar	Carbohydrate	Pentose Metabolism	ribose	HMDB00283
LC/MS Polar	Carbohydrate	Pentose Metabolism	ribulose/xylulose
LC/MS Polar	Carbohydrate	Pentose Metabolism	xylose	HMDB00098
LC/MS Polar	Cofactors and Vitamins	Ascorbate and Aldarate Metabolism	gulonate*	HMDB03290
LC/MS Polar	Cofactors and Vitamins	Ascorbate and Aldarate Metabolism	threonate	HMDB00943
LC/MS Polar	Cofactors and Vitamins	Nicotinate and Nicotinamide Metabolism	6-hydroxynicotinate	HMDB02658
LC/MS Polar	Energy	TCA Cycle	alpha-ketoglutarate	HMDB00208
LC/MS Polar	Energy	TCA Cycle	fumarate	HMDB00134
LC/MS Polar	Energy	TCA Cycle	succinate	HMDB00254
LC/MS Polar	Lipid	Fatty Acid, Dicarboxylate	2-hydroxyadipate	HMDB00321
LC/MS Polar	Lipid	Fatty Acid, Dicarboxylate	3-methyladipate	HMDB00555
LC/MS Polar	Lipid	Fatty Acid, Dicarboxylate	3-methylglutarate/2-methylglutarate	HMDB00752
LC/MS Polar	Lipid	Fatty Acid, Dicarboxylate	adipate	HMDB00448
LC/MS Polar	Lipid	Fatty Acid, Dicarboxylate	azelate (nonanedioate)	HMDB00784
LC/MS Polar	Lipid	Fatty Acid, Dicarboxylate	dimethylmalonic acid	HMDB02001
LC/MS Polar	Lipid	Fatty Acid, Dicarboxylate	glutarate (pentanedioate)	HMDB00661
LC/MS Polar	Lipid	Fatty Acid, Dicarboxylate	maleate	HMDB00176
LC/MS Polar	Lipid	Fatty Acid, Dicarboxylate	pimelate (heptanedioate)	HMDB00857
LC/MS Polar	Lipid	Fatty Acid, Dicarboxylate	suberate (octanedioate)	HMDB00893
LC/MS Polar	Lipid	Fatty Acid, Monohydroxy	3-hydroxysebacate	HMDB00350
LC/MS Polar	Lipid	Fatty Acid, Monohydroxy	3-hydroxyvalerate	HMDB00531
LC/MS Polar	Lipid	Glycolipid Metabolism	galactosylglycerol*	HMDB06790
LC/MS Polar	Lipid	Inositol Metabolism	chiro-inositol	HMDB34220
LC/MS Polar	Lipid	Inositol Metabolism	myo-inositol	HMDB00211
LC/MS Polar	Lipid	Ketone Bodies	3-hydroxybutyrate (BHBA)	HMDB00357
LC/MS Polar	Lipid	Mevalonate Metabolism	3-hydroxy-3-methylglutarate	HMDB00355
LC/MS Polar	Lipid	Mevalonate Metabolism	mevalonate	HMDB00227
LC/MS Polar	Nucleotide	Purine Metabolism, (Hypo)Xanthine/Inosine containing	allantoin	HMDB00462
LC/MS Polar	Nucleotide	Pyrimidine Metabolism, Orotate containing	dihydroorotate	HMDB03349
LC/MS Polar	Nucleotide	Pyrimidine Metabolism, Orotate containing	N-carbamoylaspartate	HMDB00828
LC/MS Polar	Nucleotide	Pyrimidine Metabolism, Orotate containing	orotate	HMDB00226
LC/MS Polar	Nucleotide	Pyrimidine Metabolism, Uracil containing	4-ureidobutyrate
LC/MS Polar	Peptide	Acetylated Peptides	phenylacetylglutamate	HMDB59772
LC/MS Polar	Xenobiotics	Bacterial/Fungal	2-acetamidobutanoate
LC/MS Polar	Xenobiotics	Benzoate Metabolism	3-hydroxybenzoate	HMDB02466
LC/MS Polar	Xenobiotics	Benzoate Metabolism	4-hydroxyhippurate	HMDB13678
LC/MS Polar	Xenobiotics	Chemical	succinimide
LC/MS Polar	Xenobiotics	Drug	salicylate	HMDB01895
LC/MS Polar	Xenobiotics	Food Component/Plant	2-isopropylmalate	HMDB00402
LC/MS Polar	Xenobiotics	Food Component/Plant	2-keto-3-deoxy-gluconate	HMDB01353
LC/MS Polar	Xenobiotics	Food Component/Plant	2,3-dihydroxyisovalerate	HMDB12141
LC/MS Polar	Xenobiotics	Food Component/Plant	acesulfame	HMDB33585
LC/MS Polar	Xenobiotics	Food Component/Plant	galacturonate	HMDB02545
LC/MS Polar	Xenobiotics	Food Component/Plant	gluconate	HMDB00625
LC/MS Polar	Xenobiotics	Food Component/Plant	N-(2-furoyl)glycine	HMDB00439
LC/MS Polar	Xenobiotics	Food Component/Plant	quinate	HMDB03072
LC/MS Polar	Xenobiotics	Xanthine Metabolism	5-acetylamino-6-amino-3-methyluracil	HMDB04400
LC/MS Polar	Xenobiotics	Xanthine Metabolism	5-acetylamino-6-formylamino-3-methyluracil	HMDB11105
LC/MS Pos Early	Amino Acid	Alanine and Aspartate Metabolism	alanine	HMDB00161
LC/MS Pos Early	Amino Acid	Alanine and Aspartate Metabolism	asparagine	HMDB00168
LC/MS Pos Early	Amino Acid	Alanine and Aspartate Metabolism	aspartate	HMDB00191
LC/MS Pos Early	Amino Acid	Alanine and Aspartate Metabolism	N-acetylasparagine	HMDB06028
LC/MS Pos Early	Amino Acid	Alanine and Aspartate Metabolism	N-methylalanine	HMDB01906
LC/MS Pos Early	Amino Acid	Creatine Metabolism	creatine	HMDB00064
LC/MS Pos Early	Amino Acid	Creatine Metabolism	creatinine	HMDB00562
LC/MS Pos Early	Amino Acid	Creatine Metabolism	guanidinoacetate	HMDB00128
LC/MS Pos Early	Amino Acid	Glutamate Metabolism	2-pyrrolidinone	HMDB02039
LC/MS Pos Early	Amino Acid	Glutamate Metabolism	4-hydroxyglutamate	HMDB01344
LC/MS Pos Early	Amino Acid	Glutamate Metabolism	carboxyethyl-GABA	HMDB02201
LC/MS Pos Early	Amino Acid	Glutamate Metabolism	glutamate	HMDB00148
LC/MS Pos Early	Amino Acid	Glutamate Metabolism	glutamate, gamma-methyl ester	HMDB61715
LC/MS Pos Early	Amino Acid	Glutamate Metabolism	glutamine	HMDB00641
LC/MS Pos Early	Amino Acid	Glutamate Metabolism	N-acetylglutamate	HMDB01138
LC/MS Pos Early	Amino Acid	Glutamate Metabolism	N-acetylglutamine	HMDB06029
LC/MS Pos Early	Amino Acid	Glutamate Metabolism	N-methyl-GABA
LC/MS Pos Early	Amino Acid	Glutamate Metabolism	pyroglutamine*
LC/MS Pos Early	Amino Acid	Glutamate Metabolism	S-1-pyrroline-5-carboxylate	HMDB01301
LC/MS Pos Early	Amino Acid	Glutamate Metabolism	succinylglutamine
LC/MS Pos Early	Amino Acid	Glutathione Metabolism	cysteinylglycine	HMDB00078
LC/MS Pos Early	Amino Acid	Glycine, Serine and Threonine Metabolism	2-methylserine
LC/MS Pos Early	Amino Acid	Glycine, Serine and Threonine Metabolism	betaine	HMDB00043
LC/MS Pos Early	Amino Acid	Glycine, Serine and Threonine Metabolism	dimethylglycine	HMDB00092
LC/MS Pos Early	Amino Acid	Glycine, Serine and Threonine Metabolism	glycine	HMDB00123
LC/MS Pos Early	Amino Acid	Glycine, Serine and Threonine Metabolism	N-acetylglycine	HMDB00532
LC/MS Pos Early	Amino Acid	Glycine, Serine and Threonine Metabolism	N-acetylserine	HMDB02931
LC/MS Pos Early	Amino Acid	Glycine, Serine and Threonine Metabolism	sarcosine	HMDB00271
LC/MS Pos Early	Amino Acid	Glycine, Serine and Threonine Metabolism	serine	HMDB00187
LC/MS Pos Early	Amino Acid	Glycine, Serine and Threonine Metabolism	threonine	HMDB00167
LC/MS Pos Early	Amino Acid	Guanidino and Acetamido Metabolism	1-methylguanidine	HMDB01522
LC/MS Pos Early	Amino Acid	Guanidino and Acetamido Metabolism	4-guanidinobutanoate	HMDB03464
LC/MS Pos Early	Amino Acid	Guanidino and Acetamido Metabolism	guanidinosuccinate	HMDB03157
LC/MS Pos Early	Amino Acid	Histidine Metabolism	1-methylhistamine	HMDB00898
LC/MS Pos Early	Amino Acid	Histidine Metabolism	1-methylhistidine	HMDB00001
LC/MS Pos Early	Amino Acid	Histidine Metabolism	1-methylimidazoleacetate	HMDB02820
LC/MS Pos Early	Amino Acid	Histidine Metabolism	3-methylhistidine	HMDB00479
LC/MS Pos Early	Amino Acid	Histidine Metabolism	4-imidazoleacetate	HMDB02024
LC/MS Pos Early	Amino Acid	Histidine Metabolism	formiminoglutamate	HMDB00854
LC/MS Pos Early	Amino Acid	Histidine Metabolism	histamine	HMDB00870
LC/MS Pos Early	Amino Acid	Histidine Metabolism	hydantoin-5-propionic acid	HMDB01212
LC/MS Pos Early	Amino Acid	Histidine Metabolism	imidazole lactate	HMDB02320
LC/MS Pos Early	Amino Acid	Histidine Metabolism	imidazole propionate	HMDB02271
LC/MS Pos Early	Amino Acid	Histidine Metabolism	N-acetyl-1-methylhistidine*
LC/MS Pos Early	Amino Acid	Histidine Metabolism	N-acetyl-3-methylhistidine*
LC/MS Pos Early	Amino Acid	Histidine Metabolism	N-acetylhistamine	HMDB13253
LC/MS Pos Early	Amino Acid	Histidine Metabolism	N-acetylhistidine	HMDB32055
LC/MS Pos Early	Amino Acid	Histidine Metabolism	trans-urocanate	HMDB00301
LC/MS Pos Early	Amino Acid	Leucine, Isoleucine and Valine Metabolism	3-methylglutarylcarnitine (2)	HMDB00552
LC/MS Pos Early	Amino Acid	Leucine, Isoleucine and Valine Metabolism	isobutyrylcarnitine (C4)	HMDB00736
LC/MS Pos Early	Amino Acid	Leucine, Isoleucine and Valine Metabolism	isoleucine	HMDB00172
LC/MS Pos Early	Amino Acid	Leucine, Isoleucine and Valine Metabolism	leucine	HMDB00687
LC/MS Pos Early	Amino Acid	Leucine, Isoleucine and Valine Metabolism	N-methylleucine
LC/MS Pos Early	Amino Acid	Leucine, Isoleucine and Valine Metabolism	valine	HMDB00883
LC/MS Pos Early	Amino Acid	Lysine Metabolism	2-aminoadipate	HMDB00510
LC/MS Pos Early	Amino Acid	Lysine Metabolism	5-aminovalerate	HMDB03355
LC/MS Pos Early	Amino Acid	Lysine Metabolism	5-hydroxylysine	HMDB00450
LC/MS Pos Early	Amino Acid	Lysine Metabolism	6-oxopiperidine-2-carboxylate	HMDB61705
LC/MS Pos Early	Amino Acid	Lysine Metabolism	cadaverine	HMDB02322
LC/MS Pos Early	Amino Acid	Lysine Metabolism	lysine	HMDB00182
LC/MS Pos Early	Amino Acid	Lysine Metabolism	N-acetyl-cadaverine	HMDB02284
LC/MS Pos Early	Amino Acid	Lysine Metabolism	N-trimethyl 5-aminovalerate
LC/MS Pos Early	Amino Acid	Lysine Metabolism	N6-formyllysine
LC/MS Pos Early	Amino Acid	Lysine Metabolism	N6,N6,N6-trimethyllysine	HMDB01325
LC/MS Pos Early	Amino Acid	Lysine Metabolism	pipecolate	HMDB00070
LC/MS Pos Early	Amino Acid	Lysine Metabolism	saccharopine	HMDB00279
LC/MS Pos Early	Amino Acid	Methionine, Cysteine, SAM and Taurine Metabolism	3-sulfo-L-alanine	HMDB02757
LC/MS Pos Early	Amino Acid	Methionine, Cysteine, SAM and Taurine Metabolism	cysteine	HMDB00574
LC/MS Pos Early	Amino Acid	Methionine, Cysteine, SAM and Taurine Metabolism	cysteine sulfinic acid	HMDB00996
LC/MS Pos Early	Amino Acid	Methionine, Cysteine, SAM and Taurine Metabolism	cystine	HMDB00192
LC/MS Pos Early	Amino Acid	Methionine, Cysteine, SAM and Taurine Metabolism	methionine	HMDB00696
LC/MS Pos Early	Amino Acid	Methionine, Cysteine, SAM and Taurine Metabolism	methionine sulfone
LC/MS Pos Early	Amino Acid	Methionine, Cysteine, SAM and Taurine Metabolism	methionine sulfoxide	HMDB02005
LC/MS Pos Early	Amino Acid	Methionine, Cysteine, SAM and Taurine Metabolism	N-acetylcysteine	HMDB01890
LC/MS Pos Early	Amino Acid	Methionine, Cysteine, SAM and Taurine Metabolism	N-acetylmethionine sulfoxide
LC/MS Pos Early	Amino Acid	Methionine, Cysteine, SAM and Taurine Metabolism	S-methylmethionine	HMDB38670
LC/MS Pos Early	Amino Acid	Methionine, Cysteine, SAM and Taurine Metabolism	taurine	HMDB00251
LC/MS Pos Early	Amino Acid	Phenylalanine Metabolism	N-methylphenylalanine
LC/MS Pos Early	Amino Acid	Phenylalanine Metabolism	phenethylamine	HMDB02017
LC/MS Pos Early	Amino Acid	Phenylalanine Metabolism	phenylalanine	HMDB00159
LC/MS Pos Early	Amino Acid	Polyamine Metabolism	4-acetamidobutanoate	HMDB03681
LC/MS Pos Early	Amino Acid	Polyamine Metabolism	5-methylthioadenosine (MTA)	HMDB01173
LC/MS Pos Early	Amino Acid	Polyamine Metabolism	acisoga
LC/MS Pos Early	Amino Acid	Polyamine Metabolism	agmatine	HMDB01432
LC/MS Pos Early	Amino Acid	Polyamine Metabolism	N-acetylputrescine	HMDB02064
LC/MS Pos Early	Amino Acid	Polyamine Metabolism	N('1)-acetylspermidine	HMDB01276
LC/MS Pos Early	Amino Acid	Polyamine Metabolism	N(1)-acetylspermine	HMDB01186
LC/MS Pos Early	Amino Acid	Polyamine Metabolism	N1,N12-diacetylspermine	HMDB02172
LC/MS Pos Early	Amino Acid	Polyamine Metabolism	putrescine	HMDB01414
LC/MS Pos Early	Amino Acid	Polyamine Metabolism	spermidine	HMDB01257
LC/MS Pos Early	Amino Acid	Tryptophan Metabolism	2-aminophenol
LC/MS Pos Early	Amino Acid	Tryptophan Metabolism	indolepropionate	HMDB02302
LC/MS Pos Early	Amino Acid	Tryptophan Metabolism	kynurenine	HMDB00684
LC/MS Pos Early	Amino Acid	Tryptophan Metabolism	N-acetylserotonin	HMDB01238
LC/MS Pos Early	Amino Acid	Tryptophan Metabolism	N-methyltryptophan
LC/MS Pos Early	Amino Acid	Tryptophan Metabolism	picolinate	HMDB02243
LC/MS Pos Early	Amino Acid	Tryptophan Metabolism	serotonin	HMDB00259
LC/MS Pos Early	Amino Acid	Tryptophan Metabolism	tryptamine	HMDB00303
LC/MS Pos Early	Amino Acid	Tryptophan Metabolism	tryptophan	HMDB00929
LC/MS Pos Early	Amino Acid	Tryptophan Metabolism	xanthurenate	HMDB00881
LC/MS Pos Early	Amino Acid	Tyrosine Metabolism	(R)-salsolinol	HMDB05199
LC/MS Pos Early	Amino Acid	Tyrosine Metabolism	m-tyramine	HMDB04989
LC/MS Pos Early	Amino Acid	Tyrosine Metabolism	o-Tyrosine	HMDB06050
LC/MS Pos Early	Amino Acid	Tyrosine Metabolism	tyramine	HMDB00306
LC/MS Pos Early	Amino Acid	Tyrosine Metabolism	tyrosine	HMDB00158
LC/MS Pos Early	Amino Acid	Urea cycle; Arginine and Proline Metabolism	2-oxoarginine*	HMDB04225
LC/MS Pos Early	Amino Acid	Urea cycle; Arginine and Proline Metabolism	argininate*	HMDB03148
LC/MS Pos Early	Amino Acid	Urea cycle; Arginine and Proline Metabolism	arginine	HMDB00517
LC/MS Pos Early	Amino Acid	Urea cycle; Arginine and Proline Metabolism	argininosuccinate	HMDB00052
LC/MS Pos Early	Amino Acid	Urea cycle; Arginine and Proline Metabolism	citrulline	HMDB00904
LC/MS Pos Early	Amino Acid	Urea cycle; Arginine and Proline Metabolism	dimethylarginine (SDMA + ADMA)	HMDB01539
LC/MS Pos Early	Amino Acid	Urea cycle; Arginine and Proline Metabolism	homoarginine	HMDB00670
LC/MS Pos Early	Amino Acid	Urea cycle; Arginine and Proline Metabolism	homocitrulline	HMDB00679
LC/MS Pos Early	Amino Acid	Urea cycle; Arginine and Proline Metabolism	N-acetylarginine	HMDB04620
LC/MS Pos Early	Amino Acid	Urea cycle; Arginine and Proline Metabolism	N-acetylproline
LC/MS Pos Early	Amino Acid	Urea cycle; Arginine and Proline Metabolism	N-alpha-acetylornithine	HMDB03357
LC/MS Pos Early	Amino Acid	Urea cycle; Arginine and Proline Metabolism	N-delta-acetylornithine
LC/MS Pos Early	Amino Acid	Urea cycle; Arginine and Proline Metabolism	N-methylproline
LC/MS Pos Early	Amino Acid	Urea cycle; Arginine and Proline Metabolism	N-monomethylarginine	HMDB29416
LC/MS Pos Early	Amino Acid	Urea cycle; Arginine and Proline Metabolism	N2,N5-diacetylornithine
LC/MS Pos Early	Amino Acid	Urea cycle; Arginine and Proline Metabolism	norvaline	HMDB13716
LC/MS Pos Early	Amino Acid	Urea cycle; Arginine and Proline Metabolism	ornithine	HMDB03374
LC/MS Pos Early	Amino Acid	Urea cycle; Arginine and Proline Metabolism	proline	HMDB00162
LC/MS Pos Early	Amino Acid	Urea cycle; Arginine and Proline Metabolism	trans-4-hydroxyproline	HMDB00725
LC/MS Pos Early	Carbohydrate	Advanced Glycation End-product	N6-carboxymethyllysine
LC/MS Pos Early	Carbohydrate	Aminosugar Metabolism	N-acetylglucosamine/N-acetylgalactosamine	HMDB00215
LC/MS Pos Early	Carbohydrate	Aminosugar Metabolism	N-acetylglucosaminylasparagine	HMDB00489
LC/MS Pos Early	Carbohydrate	Aminosugar Metabolism	N-acetylneuraminate	HMDB00230
LC/MS Pos Early	Carbohydrate	Pentose Metabolism	fucose	HMDB00174
LC/MS Pos Early	Carbohydrate	Pentose Metabolism	sedoheptulose	HMDB03219
LC/MS Pos Early	Cofactors and Vitamins	Biotin Metabolism	biocytin
LC/MS Pos Early	Cofactors and Vitamins	Biotin Metabolism	biotin	HMDB00030
LC/MS Pos Early	Cofactors and Vitamins	Nicotinate and Nicotinamide Metabolism	1-methylnicotinamide	HMDB00699
LC/MS Pos Early	Cofactors and Vitamins	Nicotinate and Nicotinamide Metabolism	N1-Methyl-2-pyridone-5-carboxamide	HMDB04193
LC/MS Pos Early	Cofactors and Vitamins	Nicotinate and Nicotinamide Metabolism	nicotinamide	HMDB01406
LC/MS Pos Early	Cofactors and Vitamins	Nicotinate and Nicotinamide Metabolism	nicotinamide riboside	HMDB00855
LC/MS Pos Early	Cofactors and Vitamins	Nicotinate and Nicotinamide Metabolism	nicotinate	HMDB01488
LC/MS Pos Early	Cofactors and Vitamins	Nicotinate and Nicotinamide Metabolism	nicotinate ribonucleoside	HMDB06809
LC/MS Pos Early	Cofactors and Vitamins	Nicotinate and Nicotinamide Metabolism	trigonelline (N'-methylnicotinate)	HMDB00875
LC/MS Pos Early	Cofactors and Vitamins	Pantothenate and CoA Metabolism	pantothenate	HMDB00210
LC/MS Pos Early	Cofactors and Vitamins	Riboflavin Metabolism	riboflavin (Vitamin B2)	HMDB00244
LC/MS Pos Early	Cofactors and Vitamins	Thiamine Metabolism	5-(2-Hydroxyethyl)-4-methylthiazole
LC/MS Pos Early	Cofactors and Vitamins	Thiamine Metabolism	hydroxymethylpyrimidine
LC/MS Pos Early	Cofactors and Vitamins	Thiamine Metabolism	thiamin (Vitamin B1)	HMDB00235
LC/MS Pos Early	Cofactors and Vitamins	Vitamin B6 Metabolism	pyridoxal	HMDB01545
LC/MS Pos Early	Cofactors and Vitamins	Vitamin B6 Metabolism	pyridoxamine	HMDB01431
LC/MS Pos Early	Cofactors and Vitamins	Vitamin B6 Metabolism	pyridoxine (Vitamin B6)	HMDB02075
LC/MS Pos Early	Energy	TCA Cycle	citrate	HMDB00094
LC/MS Pos Early	Energy	TCA Cycle	succinylcarnitine (C4-DC)	HMDB61717
LC/MS Pos Early	Lipid	Carnitine Metabolism	carnitine	HMDB00062
LC/MS Pos Early	Lipid	Carnitine Metabolism	deoxycarnitine	HMDB01161
LC/MS Pos Early	Lipid	Fatty Acid Metabolism(Acyl Carnitine)	3-hydroxybutyrylcarnitine (2)	HMDB13127
LC/MS Pos Early	Lipid	Fatty Acid Metabolism(Acyl Carnitine)	acetylcarnitine (C2)	HMDB00201
LC/MS Pos Early	Lipid	Fatty Acid Synthesis	2-methylmalonylcarnitine (C4-DC)	HMDB13133
LC/MS Pos Early	Lipid	Fatty Acid, Dicarboxylate	2-hydroxyglutarate	HMDB00606
LC/MS Pos Early	Lipid	Glycerolipid Metabolism	glycerol 3-phosphate	HMDB00126
LC/MS Pos Early	Lipid	Glycerolipid Metabolism	glycerophosphoglycerol
LC/MS Pos Early	Lipid	Mevalonate Metabolism	mevalonolactone	HMDB06024
LC/MS Pos Early	Lipid	Phospholipid Metabolism	choline	HMDB00097
LC/MS Pos Early	Lipid	Phospholipid Metabolism	choline phosphate	HMDB01565
LC/MS Pos Early	Lipid	Phospholipid Metabolism	glycerophosphoethanolamine	HMDB00114
LC/MS Pos Early	Lipid	Phospholipid Metabolism	glycerophosphoinositol*
LC/MS Pos Early	Lipid	Phospholipid Metabolism	glycerophosphoserine*
LC/MS Pos Early	Lipid	Phospholipid Metabolism	trimethylamine N-oxide	HMDB00925
LC/MS Pos Early	Nucleotide	Purine and Pyrimidine Metabolism	methylphosphate	HMDB61711
LC/MS Pos Early	Nucleotide	Purine Metabolism, (Hypo)Xanthine/Inosine containing	2'-deoxyinosine	HMDB00071
LC/MS Pos Early	Nucleotide	Purine Metabolism, (Hypo)Xanthine/Inosine containing	xanthine	HMDB00292
LC/MS Pos Early	Nucleotide	Purine Metabolism, Adenine containing	1-methyladenine	HMDB11599
LC/MS Pos Early	Nucleotide	Purine Metabolism, Adenine containing	2'-deoxyadenosine	HMDB00101
LC/MS Pos Early	Nucleotide	Purine Metabolism, Adenine containing	adenine	HMDB00034
LC/MS Pos Early	Nucleotide	Purine Metabolism, Adenine containing	adenosine	HMDB00050
LC/MS Pos Early	Nucleotide	Purine Metabolism, Adenine containing	N6-methyladenosine	HMDB04044
LC/MS Pos Early	Nucleotide	Purine Metabolism, Guanine containing	7-methylguanine	HMDB00897
LC/MS Pos Early	Nucleotide	Purine Metabolism, Guanine containing	8-hydroxyguanine	HMDB02032
LC/MS Pos Early	Nucleotide	Purine Metabolism, Guanine containing	guanine	HMDB00132
LC/MS Pos Early	Nucleotide	Purine Metabolism, Guanine containing	guanosine	HMDB00133
LC/MS Pos Early	Nucleotide	Pyrimidine Metabolism, Cytidine containing	2'-deoxycytidine	HMDB00014
LC/MS Pos Early	Nucleotide	Pyrimidine Metabolism, Cytidine containing	cytidine	HMDB00089
LC/MS Pos Early	Nucleotide	Pyrimidine Metabolism, Cytidine containing	cytosine	HMDB00630
LC/MS Pos Early	Nucleotide	Pyrimidine Metabolism, Thymine containing	3-aminoisobutyrate	HMDB03911
LC/MS Pos Early	Nucleotide	Pyrimidine Metabolism, Thymine containing	5,6-dihydrothymine	HMDB00079
LC/MS Pos Early	Nucleotide	Pyrimidine Metabolism, Uracil containing	3-ureidopropionate	HMDB00026
LC/MS Pos Early	Nucleotide	Pyrimidine Metabolism, Uracil containing	beta-alanine	HMDB00056
LC/MS Pos Early	Peptide	Dipeptide	alanylleucine	HMDB28691
LC/MS Pos Early	Peptide	Dipeptide	glutaminylleucine	HMDB29153
LC/MS Pos Early	Peptide	Dipeptide	glycylisoleucine	HMDB28844
LC/MS Pos Early	Peptide	Dipeptide	glycylleucine	HMDB00759
LC/MS Pos Early	Peptide	Dipeptide	glycylvaline	HMDB28854
LC/MS Pos Early	Peptide	Dipeptide	leucylalanine	HMDB28922
LC/MS Pos Early	Peptide	Dipeptide	leucylglutamine*	HMDB28927
LC/MS Pos Early	Peptide	Dipeptide	leucylglycine	HMDB28929
LC/MS Pos Early	Peptide	Dipeptide	lysylleucine	HMDB28955
LC/MS Pos Early	Peptide	Dipeptide	valylglutamine	HMDB29125
LC/MS Pos Early	Peptide	Dipeptide	valylleucine	HMDB29131
LC/MS Pos Early	Peptide	Dipeptide Derivative	anserine	HMDB00194
LC/MS Pos Early	Peptide	Gamma-glutamyl Amino Acid	gamma-glutamyl-2-aminobutyrate
LC/MS Pos Early	Peptide	Gamma-glutamyl Amino Acid	gamma-glutamyl-alpha-lysine
LC/MS Pos Early	Peptide	Gamma-glutamyl Amino Acid	gamma-glutamyl-epsilon-lysine	HMDB03869
LC/MS Pos Early	Peptide	Gamma-glutamyl Amino Acid	gamma-glutamylalanine	HMDB29142
LC/MS Pos Early	Peptide	Gamma-glutamyl Amino Acid	gamma-glutamylglutamine	HMDB11738
LC/MS Pos Early	Peptide	Gamma-glutamyl Amino Acid	gamma-glutamylglycine	HMDB11667
LC/MS Pos Early	Peptide	Gamma-glutamyl Amino Acid	gamma-glutamylhistidine
LC/MS Pos Early	Peptide	Gamma-glutamyl Amino Acid	gamma-glutamylmethionine	HMDB29155
LC/MS Pos Early	Peptide	Gamma-glutamyl Amino Acid	gamma-glutamylthreonine	HMDB29159
LC/MS Pos Early	Peptide	Gamma-glutamyl Amino Acid	gamma-glutamyltyrosine	HMDB11741
LC/MS Pos Early	Xenobiotics	Bacterial/Fungal	glutamyl-meso-diaminopimelate
LC/MS Pos Early	Xenobiotics	Chemical	3-hydroxypyridine
LC/MS Pos Early	Xenobiotics	Chemical	diethanolamine	HMDB04437
LC/MS Pos Early	Xenobiotics	Chemical	diglycerol
LC/MS Pos Early	Xenobiotics	Chemical	ectoine
LC/MS Pos Early	Xenobiotics	Chemical	N-methylpipecolate
LC/MS Pos Early	Xenobiotics	Chemical	thioproline
LC/MS Pos Early	Xenobiotics	Chemical	triethanolamine	HMDB32538
LC/MS Pos Early	Xenobiotics	Drug	S-carboxymethyl-L-cysteine	HMDB29415
LC/MS Pos Early	Xenobiotics	Food Component/Plant	2-piperidinone	HMDB11749
LC/MS Pos Early	Xenobiotics	Food Component/Plant	2,8-quinolinediol
LC/MS Pos Early	Xenobiotics	Food Component/Plant	4-hydroxycyclohexylcarboxylic acid	HMDB01988
LC/MS Pos Early	Xenobiotics	Food Component/Plant	6-hydroxydaidzein	HMDB31715
LC/MS Pos Early	Xenobiotics	Food Component/Plant	beta-guanidinopropanoate	HMDB13222
LC/MS Pos Early	Xenobiotics	Food Component/Plant	diaminopimelate	HMDB01370
LC/MS Pos Early	Xenobiotics	Food Component/Plant	feruloylputrescine
LC/MS Pos Early	Xenobiotics	Food Component/Plant	harmane	HMDB35196
LC/MS Pos Early	Xenobiotics	Food Component/Plant	indolin-2-one
LC/MS Pos Early	Xenobiotics	Food Component/Plant	levulinate (4-oxovalerate)	HMDB00720
LC/MS Pos Early	Xenobiotics	Food Component/Plant	methyl indole-3-acetate	HMDB29738
LC/MS Pos Early	Xenobiotics	Food Component/Plant	N-glycolylneuraminate	HMDB00833
LC/MS Pos Early	Xenobiotics	Food Component/Plant	nicotianamine
LC/MS Pos Early	Xenobiotics	Food Component/Plant	piperidine	HMDB34301
LC/MS Pos Early	Xenobiotics	Food Component/Plant	stachydrine	HMDB04827
LC/MS Pos Early	Xenobiotics	Xanthine Metabolism	1-methylurate	HMDB03099
LC/MS Pos Early	Xenobiotics	Xanthine Metabolism	7-methylurate	HMDB11107
LC/MS Pos Early	Xenobiotics	Xanthine Metabolism	paraxanthine	HMDB01860
LC/MS Pos Early	Xenobiotics	Xanthine Metabolism	theobromine	HMDB02825
LC/MS Pos Early	Xenobiotics	Xanthine Metabolism	theophylline	HMDB01889
LC/MS Pos Late	Cofactors and Vitamins	Hemoglobin and Porphyrin Metabolism	bilirubin (E,Z or Z,E)*	HMDB00488
LC/MS Pos Late	Cofactors and Vitamins	Hemoglobin and Porphyrin Metabolism	bilirubin (Z,Z)	HMDB00054
LC/MS Pos Late	Cofactors and Vitamins	Hemoglobin and Porphyrin Metabolism	biliverdin	HMDB01008
LC/MS Pos Late	Cofactors and Vitamins	Hemoglobin and Porphyrin Metabolism	D-urobilin	HMDB04161
LC/MS Pos Late	Cofactors and Vitamins	Hemoglobin and Porphyrin Metabolism	protoporphyrin IX	HMDB00241
LC/MS Pos Late	Cofactors and Vitamins	Tocopherol Metabolism	alpha-tocopherol	HMDB01893
LC/MS Pos Late	Cofactors and Vitamins	Tocopherol Metabolism	alpha-tocopherol acetate	HMDB34227
LC/MS Pos Late	Cofactors and Vitamins	Tocopherol Metabolism	alpha-tocotrienol	HMDB06327
LC/MS Pos Late	Cofactors and Vitamins	Tocopherol Metabolism	delta-tocopherol	HMDB02902
LC/MS Pos Late	Cofactors and Vitamins	Tocopherol Metabolism	gamma-tocopherol/beta-tocopherol
LC/MS Pos Late	Cofactors and Vitamins	Tocopherol Metabolism	gamma-tocotrienol	HMDB12958
LC/MS Pos Late	Cofactors and Vitamins	Vitamin A Metabolism	retinol (Vitamin A)	HMDB00305
LC/MS Pos Late	Lipid	Ceramides	ceramide (d18:1/14:0, d16:1/16:0)*
LC/MS Pos Late	Lipid	Ceramides	eicosanoylsphingosine (d20:1)*
LC/MS Pos Late	Lipid	Ceramides	glycosyl-N-palmitoyl-sphingosine (d18:1/16:0)
LC/MS Pos Late	Lipid	Ceramides	glycosyl-N-stearoyl-sphingosine (d18:1/18:0)
LC/MS Pos Late	Lipid	Ceramides	lactosyl-N-nervonoyl-sphingosine (d18:1/24:1)*
LC/MS Pos Late	Lipid	Ceramides	lactosyl-N-palmitoyl-sphingosine (d18:1/16:0)
LC/MS Pos Late	Lipid	Ceramides	N-palmitoyl-sphingosine (d18:1/16:0)	HMDB04949
LC/MS Pos Late	Lipid	Ceramides	N-stearoyl-sphingosine (d18:1/18:0)*	HMDB04950
LC/MS Pos Late	Lipid	Diacylglycerol	diacylglycerol (12:0/18:1, 14:0/16:1, 16:0/14:1) [1]*
LC/MS Pos Late	Lipid	Diacylglycerol	diacylglycerol (12:0/18:1, 14:0/16:1, 16:0/14:1) [2]*
LC/MS Pos Late	Lipid	Diacylglycerol	diacylglycerol (14:0/18:1, 16:0/16:1) [1]*
LC/MS Pos Late	Lipid	Diacylglycerol	diacylglycerol (14:0/18:1, 16:0/16:1) [2]*
LC/MS Pos Late	Lipid	Diacylglycerol	diacylglycerol (16:1/18:2 [2], 16:0/18:3 [1])*
LC/MS Pos Late	Lipid	Diacylglycerol	linolenoyl-linolenoyl-glycerol (18:3/18:3) [1]*	HMDB07278
LC/MS Pos Late	Lipid	Diacylglycerol	linolenoyl-linolenoyl-glycerol (18:3/18:3) [2]*	HMDB07278
LC/MS Pos Late	Lipid	Diacylglycerol	linoleoyl-linolenoyl-glycerol (18:2/18:3) [2]*	HMDB07250
LC/MS Pos Late	Lipid	Diacylglycerol	linoleoyl-linoleoyl-glycerol (18:2/18:2) [1]*	HMDB07248
LC/MS Pos Late	Lipid	Diacylglycerol	linoleoyl-linoleoyl-glycerol (18:2/18:2) [2]*	HMDB07248
LC/MS Pos Late	Lipid	Diacylglycerol	oleoyl-arachidonoyl-glycerol (18:1/20:4) [1]*	HMDB07228
LC/MS Pos Late	Lipid	Diacylglycerol	oleoyl-linolenoyl-glycerol (18:1/18:3) [2]*	HMDB07220
LC/MS Pos Late	Lipid	Diacylglycerol	oleoyl-linoleoyl-glycerol (18:1/18:2) [1]	HMDB07219
LC/MS Pos Late	Lipid	Diacylglycerol	oleoyl-linoleoyl-glycerol (18:1/18:2) [2]	HMDB07219
LC/MS Pos Late	Lipid	Diacylglycerol	oleoyl-oleoyl-glycerol (18:1/18:1) [1]*	HMDB07218
LC/MS Pos Late	Lipid	Diacylglycerol	oleoyl-oleoyl-glycerol (18:1/18:1) [2]*	HMDB07218
LC/MS Pos Late	Lipid	Diacylglycerol	palmitoleoyl-linoleoyl-glycerol (16:1/18:2) [1]*	HMDB07132
LC/MS Pos Late	Lipid	Diacylglycerol	palmitoyl-linolenoyl-glycerol (16:0/18:3) [2]*	HMDB07105
LC/MS Pos Late	Lipid	Diacylglycerol	palmitoyl-linoleoyl-glycerol (16:0/18:2) [1]*	HMDB07103
LC/MS Pos Late	Lipid	Diacylglycerol	palmitoyl-linoleoyl-glycerol (16:0/18:2) [2]*	HMDB07103
LC/MS Pos Late	Lipid	Diacylglycerol	palmitoyl-oleoyl-glycerol (16:0/18:1) [1]*	HMDB07102
LC/MS Pos Late	Lipid	Diacylglycerol	palmitoyl-oleoyl-glycerol (16:0/18:1) [2]*	HMDB07102
LC/MS Pos Late	Lipid	Diacylglycerol	stearoyl-linoleoyl-glycerol (18:0/18:2) [2]*
LC/MS Pos Late	Lipid	Endocannabinoid	arachidoyl ethanolamide (20:0)*
LC/MS Pos Late	Lipid	Endocannabinoid	behenoyl ethanolamide (22:0)*
LC/MS Pos Late	Lipid	Endocannabinoid	erucoyl ethanolamide (22:1)*
LC/MS Pos Late	Lipid	Endocannabinoid	margaroyl ethanolamide*
LC/MS Pos Late	Lipid	Endocannabinoid	oleoyl ethanolamide	HMDB02088
LC/MS Pos Late	Lipid	Endocannabinoid	stearoyl ethanolamide	HMDB13078
LC/MS Pos Late	Lipid	Fatty Acid Hydroxyl Fatty Acid	LAHSA (18:2/OH-18:0)*
LC/MS Pos Late	Lipid	Fatty Acid Hydroxyl Fatty Acid	OAHSA (18:1/OH-18:0)*
LC/MS Pos Late	Lipid	Fatty Acid Hydroxyl Fatty Acid	PAHSA (16:0/OH-18:0)
LC/MS Pos Late	Lipid	Fatty Acid Metabolism(Acyl Carnitine)	arachidoylcarnitine (C20)*	HMDB06460
LC/MS Pos Late	Lipid	Fatty Acid Metabolism(Acyl Carnitine)	behenoylcarnitine (C22)*
LC/MS Pos Late	Lipid	Fatty Acid Metabolism(Acyl Carnitine)	cerotoylcarnitine (C26)*	HMDB06347
LC/MS Pos Late	Lipid	Fatty Acid Metabolism(Acyl Carnitine)	lignoceroylcarnitine (C24)*
LC/MS Pos Late	Lipid	Fatty Acid Metabolism(Acyl Carnitine)	linolenoylcarnitine (C18:3)*
LC/MS Pos Late	Lipid	Fatty Acid Metabolism(Acyl Carnitine)	linoleoylcarnitine (C18:2)*	HMDB06469
LC/MS Pos Late	Lipid	Fatty Acid Metabolism(Acyl Carnitine)	myristoylcarnitine (C14)	HMDB05066
LC/MS Pos Late	Lipid	Fatty Acid Metabolism(Acyl Carnitine)	nervonoylcarnitine (C24:1)*
LC/MS Pos Late	Lipid	Fatty Acid Metabolism(Acyl Carnitine)	oleoylcarnitine (C18:1)	HMDB05065
LC/MS Pos Late	Lipid	Fatty Acid Metabolism(Acyl Carnitine)	palmitoleoylcarnitine (C16:1)*
LC/MS Pos Late	Lipid	Fatty Acid Metabolism(Acyl Carnitine)	palmitoylcarnitine (C16)	HMDB00222
LC/MS Pos Late	Lipid	Fatty Acid Metabolism(Acyl Carnitine)	stearoylcarnitine (C18)	HMDB00848
LC/MS Pos Late	Lipid	Fatty Acid, Monohydroxy	13-HOTrE	HMDB10203
LC/MS Pos Late	Lipid	Glycolipid Metabolism	1-linoleoyl-2-linolenoyl-galactosylglycerol (18:2/18:3)*
LC/MS Pos Late	Lipid	Glycolipid Metabolism	1-palmitoyl-2-linoleoyl-digalactosylglycerol (16:0/18:2)*
LC/MS Pos Late	Lipid	Glycolipid Metabolism	1-palmitoyl-2-linoleoyl-galactosylglycerol (16:0/18:2)*
LC/MS Pos Late	Lipid	Glycolipid Metabolism	1,2-dilinolenoyl-galactosylglycerol (18:3/18:3)*
LC/MS Pos Late	Lipid	Glycolipid Metabolism	1,2-dilinoleoyl-digalactosylglycerol (18:2/18:2)*
LC/MS Pos Late	Lipid	Glycolipid Metabolism	1,2-dilinoleoyl-galactosylglycerol (18:2/18:2)*
LC/MS Pos Late	Lipid	Lysophospholipid	1-linoleoyl-GPC (18:2)	HMDB10386
LC/MS Pos Late	Lipid	Lysophospholipid	1-linoleoyl-GPE (18:2)*	HMDB11507
LC/MS Pos Late	Lipid	Lysophospholipid	1-oleoyl-GPC (18:1)	HMDB02815
LC/MS Pos Late	Lipid	Lysophospholipid	1-palmitoyl-GPC (16:0)	HMDB10382
LC/MS Pos Late	Lipid	Lysophospholipid	1-stearoyl-GPC (18:0)	HMDB10384
LC/MS Pos Late	Lipid	Phosphatidylcholine (PC)	1-palmitoyl-2-linoleoyl-GPC (16:0/18:2)	HMDB07973
LC/MS Pos Late	Lipid	Phosphatidylcholine (PC)	1-palmitoyl-2-oleoyl-GPC (16:0/18:1)	HMDB07972
LC/MS Pos Late	Lipid	Sphingolipid Metabolism	3-ketosphinganine	HMDB01480
LC/MS Pos Late	Lipid	Sphingolipid Metabolism	heptadecasphingosine (d17:1)
LC/MS Pos Late	Lipid	Sphingolipid Metabolism	hexadecasphinganine (d16:0)*
LC/MS Pos Late	Lipid	Sphingolipid Metabolism	hexadecasphingosine (d16:1)*
LC/MS Pos Late	Lipid	Sphingolipid Metabolism	lactosyl-N-behenoyl-sphingosine (d18:1/22:0)*
LC/MS Pos Late	Lipid	Sphingolipid Metabolism	N-2-hydroxypalmitoyl-sphingosine (d18:1/16:0(2OH))
LC/MS Pos Late	Lipid	Sphingolipid Metabolism	N-palmitoyl-sphinganine (d18:0/16:0)	HMDB11760
LC/MS Pos Late	Lipid	Sphingolipid Metabolism	palmitoyl dihydrosphingomyelin (d18:0/16:0)*
LC/MS Pos Late	Lipid	Sphingolipid Metabolism	palmitoyl sphingomyelin (d18:1/16:0)
LC/MS Pos Late	Lipid	Sphingolipid Metabolism	phytosphingosine	HMDB04610
LC/MS Pos Late	Lipid	Sphingolipid Metabolism	sphinganine	HMDB00269
LC/MS Pos Late	Lipid	Sphingolipid Metabolism	sphingosine	HMDB00252
LC/MS Pos Late	Lipid	Sterol	4-cholesten-3-one	HMDB00921
LC/MS Pos Late	Lipid	Sterol	7-hydroxycholesterol (alpha or beta)	HMDB06119
LC/MS Pos Late	Lipid	Sterol	beta-sitosterol	HMDB00852
LC/MS Pos Late	Lipid	Sterol	campesterol	HMDB02869
LC/MS Pos Late	Lipid	Sterol	cholesterol	HMDB00067
LC/MS Pos Late	Lipid	Sterol	coprostanol	HMDB00577
LC/MS Pos Late	Lipid	Sterol	desmosterol	HMDB02719
LC/MS Pos Late	Lipid	Sterol	stigmasterol	HMDB00937
LC/MS Pos Late	Xenobiotics	Food Component/Plant	beta-cryptoxanthin	HMDB33844
LC/MS Pos Late	Xenobiotics	Food Component/Plant	carotene diol (1)
LC/MS Pos Late	Xenobiotics	Food Component/Plant	carotene diol (2)
LC/MS Pos Late	Xenobiotics	Food Component/Plant	carotene diol (3)
LC/MS Pos Late	Xenobiotics	Food Component/Plant	glycyrrhetinate	HMDB11628
LC/MS Pos Late	Xenobiotics	Food Component/Plant	pheophorbide A
LC/MS Pos Late	Xenobiotics	Food Component/Plant	piperine	HMDB29377
LC/MS Pos Late	Xenobiotics	Food Component/Plant	sitostanol	HMDB00494
LC/MS Pos Late	Xenobiotics	Food Component/Plant	solanidine	HMDB03236
